# Supplementary material for: Identification of a Natural Killer Cell Receptor Allele That Prolongs Survival of Cytomegalovirus-Positive Glioblastoma Patients
Source: Oxford University Press journal article supplement (doi:10.1158/0008-5472.can-16-1162), 2016-07-12
Supplement: 00085472can161162-sup-165465_1_supp_0_f9zz5v.docx [file 00085472can161162-sup-165465_1_supp_0_f9zz5v.docx]

### Figure S1

###
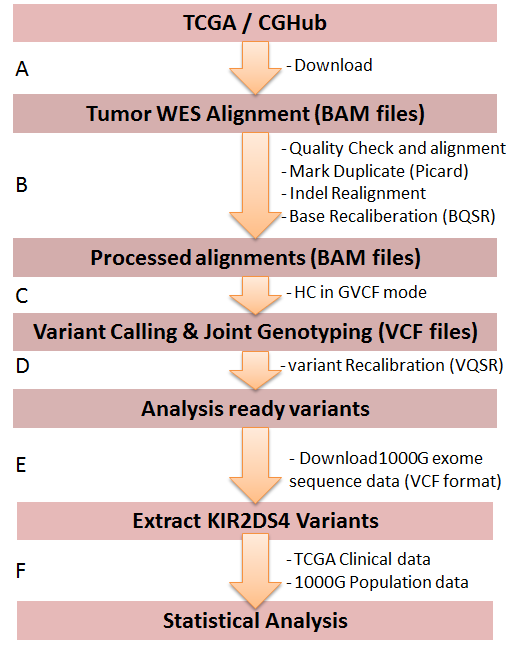


### Figure S2

###
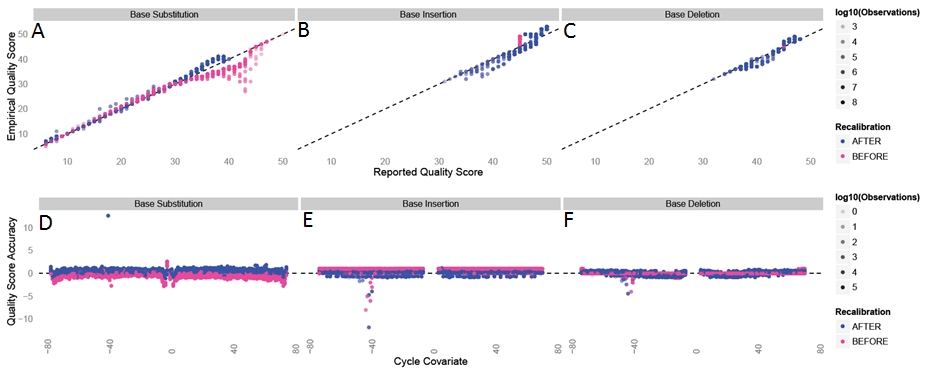


### Figure S3

###
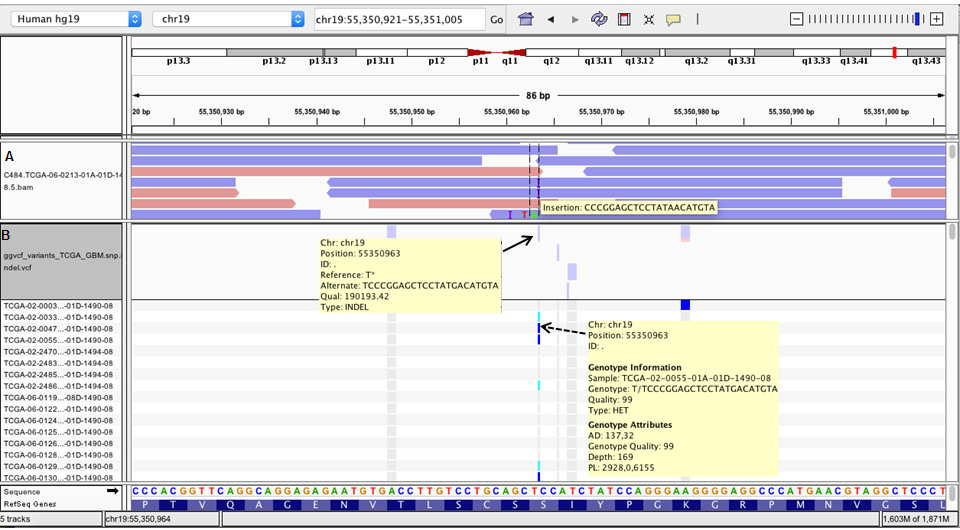


### Table SI. Characteristics of the patients and control population used in this study

| GBM patients samples from TCGA (n=300) *ǂ¥ | | | | | | | | Healthy control population (n=2504) ¤ ∆ | | | | | | | |
| --- | --- | --- | --- | --- | --- | --- | --- | --- | --- | --- | --- | --- | --- | --- | --- |
| **Characteristics** | |  |  | **Value** | | | | **Characteristics** | |  |  | **Value** | | | |
| Age at Diagnosis- yr | | |  | 60.8±13.5 | | | | Race or ethnic group -no (%) | | |  |  | | | |
| Race or ethnic group -no (%) | | | | | | | |  | AFR |  |  | 661(26) | | | |
|  | White |  |  | | 256 (85) | | |  | AMR |  |  | 347 (14) | | | |
|  | Black |  |  | | 30 (10) | | |  | EAS |  |  | 504 (20) | | | |
|  | Asian |  |  | | 5 (2) | | |  | EUR |  |  | 503 (20) | | | |
|  | NA |  |  | | 9 (3) | | |  | SAS |  |  | 489 (20) | | | |
| Sex - no (%) | |  |  | |  | | | Sex - no (%) | |  |  |  | | | |
|  | Male |  |  | | 191 (64) | | | AFR | Male |  |  | 342 (52) | | | |
|  | Female |  |  | | 108 (36) | | |  | Female |  |  | 319 (48) | | | |
|  | NA |  |  | | 1 (0,3) | | | AMR | Male |  |  | 170 (49) | | | |
| Vital Status - no (%) | | |  | |  | | |  | Female |  |  | 177 (51) | | | |
|  | Alive |  |  | | 193 (64) | | | EAS | Male |  |  | 244 (48) | | | |
|  | Dead |  |  | | 104 (35) | | |  | Female |  |  | 260 (52) | | | |
|  | NA |  |  | | 3 (1) | | | EUR | Male |  |  | 240 (48) | | | |
| Year of Diagnosis - no (%) | | |  | |  | | |  | Female |  |  | 263 (52) | | | |
|  | Before 2005 | |  | | 62 (21) | | | SAS | Male |  |  | 260 (53) | | | |
|  | 2005 - 2009 | |  | | 152 (51) | | |  | Female |  |  | 229 (47) | | | |
|  | 2009 - 2013 | |  | | 85 (28) | | | Total | Male |  |  | 1256 (50) | | | |
|  | NA |  |  | | 1 (0,3) | | |  | Female |  |  | 1248 (50) | | | |
| * Plus-minus values are means ± SD | | | | | | |  | ¤ Data Source: 1000 Genome Project | | | | | | |  |
| ǂ Data source: The Cancer Genome Atlas Project | | | | | | | | ∆ AFR = African, AMR = Ad Mixed American , | | | | | | | |
| ¥ NA = Data not available | | |  | | |  | | EAS = East Asian, EUR = European, | | | | |  | | |
|  |  |  |  | | |  | | SAS = South Asian | |  | | |  |  | |

**Table SII. Clinical data of 300 GBM patient obtained from The Cancer Genome Atlas (TCGA) project.**

| **Patient barcode** | **Gender** | **Race** | **Age at initial pathologic diagnosis** | **Initial pathologic year** | **vital status** | **Last contact days to** | **Death days to** | **Karnofsky score** |
| --- | --- | --- | --- | --- | --- | --- | --- | --- |
| TCGA-02-0003 | MALE | WHITE | 50 | 2003 | Dead | 144 | 144 | 100 |
| TCGA-02-0033 | MALE | WHITE | 54 | 2003 | Dead | 86 | 86 | 100 |
| TCGA-02-0047 | MALE | WHITE | 78 | 2005 | Dead | 448 | 448 | 80 |
| TCGA-02-0055 | FEMALE | WHITE | 62 | 2005 | Dead | 76 | 76 | 80 |
| TCGA-02-2470 | MALE | WHITE | 57 | 2007 | Dead | 393 | 393 | 60 |
| TCGA-02-2483 | MALE | ASIAN | 43 | 2008 | Alive | 466 | N/A | 80 |
| TCGA-02-2485 | MALE | BLACK OR AFRICAN AMERICAN | 53 | 2009 | Alive | 470 | N/A | 80 |
| TCGA-02-2486 | MALE | WHITE | 64 | 2008 | Alive | 493 | N/A | 80 |
| TCGA-06-0119 | FEMALE | WHITE | 81 | 2005 | Dead | N/A | 82 | N/A |
| TCGA-06-0122 | FEMALE | WHITE | 84 | 2006 | Dead | 8 | 187 | N/A |
| TCGA-06-0124 | MALE | WHITE | 67 | 1998 | Dead | 123 | 620 | N/A |
| TCGA-06-0125 | FEMALE | WHITE | 63 | 2001 | Dead | 1439 | 1448 | 60 |
| TCGA-06-0126 | MALE | WHITE | 86 | 2001 | Dead | 3 | 211 | 60 |
| TCGA-06-0128 | MALE | WHITE | 66 | 2000 | Dead | 691 | 691 | 80 |
| TCGA-06-0129 | MALE | ASIAN | 30 | 2002 | Dead | 989 | 1024 | 100 |
| TCGA-06-0130 | MALE | WHITE | 54 | 2003 | Dead | 320 | 394 | 80 |
| TCGA-06-0132 | MALE | WHITE | 49 | 2007 | Dead | 570 | 771 | N/A |
| TCGA-06-0137 | FEMALE | WHITE | 63 | 2003 | Dead | 702 | 812 | N/A |
| TCGA-06-0138 | MALE | WHITE | 43 | 2004 | Dead | 674 | 737 | 80 |
| TCGA-06-0139 | MALE | WHITE | 40 | 2006 | Dead | 327 | 362 | 60 |
| TCGA-06-0140 | MALE | WHITE | 86 | 2003 | Dead | N/A | 6 | 90 |
| TCGA-06-0141 | MALE | WHITE | 62 | 2000 | Dead | 280 | 313 | 80 |
| TCGA-06-0142 | MALE | WHITE | 81 | 2002 | Dead | N/A | 67 | N/A |
| TCGA-06-0145 | FEMALE | WHITE | 53 | 2002 | Dead | 71 | 71 | N/A |
| TCGA-06-0151 | FEMALE | WHITE | 32 | 1995 | Dead | N/A | 1417 | 70 |
| TCGA-06-0152 | MALE | WHITE | 68 | 1995 | Dead | 359 | 375 | N/A |
| TCGA-06-0154 | MALE | WHITE | 54 | 1998 | Dead | 389 | 424 | 100 |
| TCGA-06-0155 | MALE | WHITE | 61 | 1998 | Dead | 263 | 318 | 80 |
| TCGA-06-0156 | MALE | WHITE | 57 | 1998 | Dead | 164 | 178 | N/A |
| TCGA-06-0157 | FEMALE | WHITE | 63 | 1998 | Dead | 97 | 97 | 40 |
| TCGA-06-0158 | MALE | WHITE | 73 | 1998 | Dead | 166 | 329 | 80 |
| TCGA-06-0165 | MALE | WHITE | 52 | 2001 | Dead | N/A | 324 | 90 |
| TCGA-06-0166 | MALE | WHITE | 51 | 2001 | Dead | 161 | 178 | N/A |
| TCGA-06-0167 | MALE | BLACK OR AFRICAN AMERICAN | 44 | 2001 | Dead | N/A | 347 | 90 |
| TCGA-06-0168 | FEMALE | WHITE | 59 | 2002 | Dead | 579 | 598 | 100 |
| TCGA-06-0169 | MALE | WHITE | 68 | 2002 | Dead | 95 | 100 | 80 |
| TCGA-06-0171 | MALE | WHITE | 65 | 2002 | Dead | 396 | 399 | 100 |
| TCGA-06-0173 | FEMALE | WHITE | 72 | 2003 | Dead | 7 | 136 | N/A |
| TCGA-06-0174 | MALE | WHITE | 54 | 2003 | Dead | 67 | 98 | 80 |
| TCGA-06-0176 | MALE | ASIAN | 34 | 2004 | Alive | 1562 | N/A | 80 |
| TCGA-06-0178 | MALE | WHITE | 38 | 2004 | Alive | 1642 | N/A | N/A |
| TCGA-06-0184 | MALE | WHITE | 63 | 2005 | Alive | 1228 | N/A | 80 |
| TCGA-06-0185 | MALE | WHITE | 54 | 2005 | Alive | 1126 | N/A | 100 |
| TCGA-06-0187 | MALE | WHITE | 69 | 2006 | Dead | 801 | 828 | 60 |
| TCGA-06-0188 | MALE | WHITE | 71 | 2006 | Alive | 866 | N/A | 100 |
| TCGA-06-0189 | MALE | WHITE | 55 | 2006 | Dead | 454 | 469 | N/A |
| TCGA-06-0190 | MALE | WHITE | 62 | 2006 | Dead | 313 | 317 | 80 |
| TCGA-06-0192 | MALE | WHITE | 58 | 2007 | Alive | 557 | N/A | 100 |
| TCGA-06-0195 | MALE | WHITE | 63 | 1994 | Dead | 214 | 225 | 100 |
| TCGA-06-0209 | MALE | WHITE | 76 | 1997 | Dead | 119 | 232 | N/A |
| TCGA-06-0210 | FEMALE | WHITE | 72 | 1997 | Dead | 151 | 225 | N/A |
| TCGA-06-0211 | MALE | WHITE | 47 | 1997 | Dead | 360 | 360 | 100 |
| TCGA-06-0213 | FEMALE | WHITE | 55 | 1998 | Dead | 6 | 16 | N/A |
| TCGA-06-0214 | MALE | WHITE | 66 | 1998 | Dead | 378 | 457 | 100 |
| TCGA-06-0216 | FEMALE | WHITE | 61 | 1999 | Dead | 684 | 735 | 80 |
| TCGA-06-0219 | MALE | WHITE | 67 | 2000 | Dead | 11 | 22 | N/A |
| TCGA-06-0221 | MALE | WHITE | 31 | 2000 | Dead | 548 | 603 | 100 |
| TCGA-06-0237 | FEMALE | WHITE | 75 | 2006 | Dead | 315 | 415 | N/A |
| TCGA-06-0238 | MALE | WHITE | 46 | 2007 | Dead | 359 | 405 | 80 |
| TCGA-06-0240 | MALE | WHITE | 57 | 2007 | Dead | N/A | 621 | 90 |
| TCGA-06-0241 | FEMALE | WHITE | 65 | 2007 | Alive | 455 | N/A | 100 |
| TCGA-06-0644 | MALE | BLACK OR AFRICAN AMERICAN | 71 | 2007 | Alive | 375 | N/A | 80 |
| TCGA-06-0645 | FEMALE | WHITE | 55 | 2007 | Dead | 98 | 175 | N/A |
| TCGA-06-0646 | MALE | WHITE | 60 | 2007 | Dead | 136 | 175 | 80 |
| TCGA-06-0648 | MALE | WHITE | 77 | 2007 | Dead | 294 | 298 | 80 |
| TCGA-06-0649 | FEMALE | BLACK OR AFRICAN AMERICAN | 73 | 2007 | Dead | 62 | 64 | N/A |
| TCGA-06-0650 | FEMALE | WHITE | 39 | 2007 | Dead | 717 | 717 | N/A |
| TCGA-06-0686 | MALE | WHITE | 53 | 2008 | Alive | 286 | N/A | N/A |
| TCGA-06-0743 | MALE | WHITE | 69 | 2006 | Alive | 679 | N/A | 100 |
| TCGA-06-0744 | MALE | WHITE | 66 | 2007 | Alive | 595 | N/A | 80 |
| TCGA-06-0745 | MALE | WHITE | 59 | 2007 | Dead | 164 | 239 | 80 |
| TCGA-06-0747 | MALE | WHITE | 53 | 2007 | Dead | 82 | 82 | 80 |
| TCGA-06-0749 | MALE | BLACK OR AFRICAN AMERICAN | 50 | 2008 | Dead | 66 | 82 | N/A |
| TCGA-06-0750 | MALE | WHITE | 43 | 2008 | Dead | 28 | 28 | 80 |
| TCGA-06-0876 | FEMALE | BLACK OR AFRICAN AMERICAN | 72 | 2008 | Alive | 271 | N/A | 80 |
| TCGA-06-0877 | MALE | WHITE | 78 | 2008 | Alive | 204 | N/A | N/A |
| TCGA-06-0879 | MALE | WHITE | 52 | 2008 | Alive | 699 | N/A | 80 |
| TCGA-06-0881 | MALE | WHITE | 50 | 2008 | Alive | 178 | N/A | 80 |
| TCGA-06-0882 | MALE | WHITE | 30 | 2008 | Alive | 165 | N/A | 60 |
| TCGA-06-0939 | FEMALE | WHITE | 79 | 2008 | Alive | 637 | N/A | 80 |
| TCGA-06-1804 | FEMALE | WHITE | 81 | 2009 | Dead | 414 | 414 | N/A |
| TCGA-06-1806 | MALE | WHITE | 47 | 2009 | Dead | N/A | 466 | 90 |
| TCGA-06-2557 | MALE | BLACK OR AFRICAN AMERICAN | 76 | 2008 | Dead | 33 | 33 | 40 |
| TCGA-06-2558 | FEMALE | WHITE | 75 | 2008 | Dead | 23 | 380 | 60 |
| TCGA-06-2559 | MALE | WHITE | 83 | 2009 | Dead | 150 | 150 | 60 |
| TCGA-06-2561 | FEMALE | WHITE | 53 | 2009 | Alive | 282 | N/A | 80 |
| TCGA-06-2562 | MALE | WHITE | 81 | 2009 | Alive | 86 | N/A | 80 |
| TCGA-06-2563 | FEMALE | WHITE | 72 | 2009 | Alive | 259 | N/A | 80 |
| TCGA-06-2564 | MALE | WHITE | 50 | 2009 | Alive | 181 | N/A | 100 |
| TCGA-06-2567 | MALE | WHITE | 65 | 2009 | Dead | 133 | 133 | 80 |
| TCGA-06-2569 | FEMALE | BLACK OR AFRICAN AMERICAN | 24 | 2009 | Alive | 13 | N/A | 80 |
| TCGA-06-2570 | FEMALE | WHITE | 21 | 2009 | Alive | 285 | N/A | 100 |
| TCGA-06-5408 | FEMALE | WHITE | 54 | 2009 | Dead | 342 | 357 | 80 |
| TCGA-06-5410 | FEMALE | WHITE | 72 | 2010 | Dead | 108 | 108 | 60 |
| TCGA-06-5411 | MALE | WHITE | 51 | 2010 | Dead | 254 | 254 | 80 |
| TCGA-06-5412 | FEMALE | WHITE | 78 | 2010 | Dead | 138 | 138 | 80 |
| TCGA-06-5413 | MALE | WHITE | 67 | 2010 | Alive | 268 | N/A | 60 |
| TCGA-06-5414 | MALE | WHITE | 61 | 2010 | Alive | 273 | N/A | 80 |
| TCGA-06-5415 | MALE | WHITE | 60 | 2010 | Alive | 260 | N/A | 100 |
| TCGA-06-5416 | FEMALE | WHITE | 23 | 2010 | Alive | 204 | N/A | 80 |
| TCGA-06-5417 | FEMALE | WHITE | 45 | 2010 | Alive | 155 | N/A | 80 |
| TCGA-06-5418 | FEMALE | WHITE | 75 | 2010 | Dead | 83 | 83 | 60 |
| TCGA-06-5856 | MALE | WHITE | 58 | 2010 | Dead | 114 | 114 | N/A |
| TCGA-06-5858 | FEMALE | WHITE | 45 | 2010 | Alive | 187 | N/A | 100 |
| TCGA-06-5859 | MALE | WHITE | 63 | 2011 | Alive | 139 | N/A | 40 |
| TCGA-06-6388 | FEMALE | WHITE | 64 | 2011 | Dead | 120 | 159 | 80 |
| TCGA-06-6389 | FEMALE | WHITE | 49 | 2011 | Alive | 237 | N/A | 100 |
| TCGA-06-6390 | MALE | WHITE | 58 | 2011 | Dead | 164 | 164 | 80 |
| TCGA-06-6391 | FEMALE | WHITE | 44 | 2011 | Dead | N/A | 45 | N/A |
| TCGA-06-6693 | FEMALE | WHITE | 64 | 1993 | Dead | 15 | 3667 | N/A |
| TCGA-06-6694 | FEMALE | WHITE | 76 | 1994 | Dead | 224 | 224 | N/A |
| TCGA-06-6695 | MALE | WHITE | 64 | 2010 | Alive | 253 | N/A | 40 |
| TCGA-06-6697 | MALE | WHITE | 65 | 2010 | Alive | 391 | N/A | 80 |
| TCGA-06-6698 | FEMALE | WHITE | 53 | 2011 | Alive | 145 | N/A | N/A |
| TCGA-06-6699 | FEMALE | WHITE | 58 | 2011 | Alive | 47 | N/A | N/A |
| TCGA-06-6700 | MALE | WHITE | 76 | 2011 | Alive | 145 | N/A | 100 |
| TCGA-06-6701 | MALE | WHITE | 60 | 2011 | Alive | 151 | N/A | N/A |
| TCGA-06-A5U0 | FEMALE | BLACK OR AFRICAN AMERICAN | 21 | 2012 | Alive | 143 | N/A | 90 |
| TCGA-06-A5U1 | FEMALE | BLACK OR AFRICAN AMERICAN | 78 | 2011 | Dead | N/A | 57 | [Not Evaluated] |
| TCGA-06-A6S0 | MALE | BLACK OR AFRICAN AMERICAN | 79 | 2011 | Dead | N/A | 95 | [Not Evaluated] |
| TCGA-06-A6S1 | FEMALE | BLACK OR AFRICAN AMERICAN | 53 | 2012 | Dead | N/A | 78 | 60 |
| TCGA-06-A7TK | MALE | BLACK OR AFRICAN AMERICAN | 64 | 2013 | Alive | 164 | N/A | 70 |
| TCGA-06-A7TL | FEMALE | BLACK OR AFRICAN AMERICAN | 30 | 2013 | Alive | 165 | N/A | 100 |
| TCGA-08-0386 | MALE | WHITE | 74 | 2005 | Dead | 478 | 548 | 80 |
| TCGA-12-0615 | FEMALE | WHITE | 78 | 2005 | Dead | 426 | 467 | 60 |
| TCGA-12-0616 | FEMALE | WHITE | 36 | 2006 | Dead | 439 | 448 | 100 |
| TCGA-12-0618 | MALE | WHITE | 49 | 2003 | Dead | 50 | 395 | 60 |
| TCGA-12-0619 | MALE | WHITE | 60 | 2003 | Dead | 316 | 1062 | 80 |
| TCGA-12-0688 | MALE | WHITE | 74 | 1998 | Dead | 734 | 811 | 100 |
| TCGA-12-0692 | FEMALE | WHITE | 75 | 2000 | Dead | 80 | 111 | 60 |
| TCGA-12-0821 | MALE | WHITE | 62 | 1998 | Dead | 323 | 323 | 60 |
| TCGA-12-1597 | FEMALE | WHITE | 62 | 2002 | Dead | 427 | 675 | 80 |
| TCGA-12-3649 | MALE | WHITE | 76 | 2008 | Dead | 351 | 463 | 80 |
| TCGA-12-3650 | MALE | WHITE | 46 | 2008 | Dead | 333 | 333 | 80 |
| TCGA-12-3652 | MALE | WHITE | 60 | 2003 | Dead | 1050 | 1062 | 80 |
| TCGA-12-3653 | FEMALE | WHITE | 34 | 2008 | Dead | 357 | 442 | 80 |
| TCGA-12-5295 | FEMALE | WHITE | 60 | 2008 | Dead | 399 | 454 | N/A |
| TCGA-12-5299 | FEMALE | WHITE | 56 | 2009 | Dead | 98 | 98 | 80 |
| TCGA-14-0740 | MALE | WHITE | 70 | 2002 | Dead | 364 | 364 | 60 |
| TCGA-14-0781 | MALE | BLACK OR AFRICAN AMERICAN | 49 | 2003 | Dead | 29 | 29 | N/A |
| TCGA-14-0786 | FEMALE | WHITE | 50 | 1998 | Dead | 701 | 701 | 80 |
| TCGA-14-0787 | MALE | ASIAN | 69 | 1999 | Dead | 68 | 68 | 60 |
| TCGA-14-0789 | MALE | WHITE | 54 | 2005 | Dead | 342 | 342 | 40 |
| TCGA-14-0790 | FEMALE | WHITE | 64 | 2006 | Dead | 419 | 419 | 60 |
| TCGA-14-0813 | MALE | WHITE | 78 | 2004 | Dead | 41 | 41 | 60 |
| TCGA-14-0817 | FEMALE | WHITE | 69 | 2002 | Dead | 164 | 164 | 60 |
| TCGA-14-0862 | MALE | WHITE | 60 | 2002 | Dead | 88 | 88 | 40 |
| TCGA-14-0871 | FEMALE | WHITE | 74 | 1998 | Dead | 880 | 880 | 60 |
| TCGA-14-1034 | FEMALE | N/A | 60 | 1999 | Dead | 485 | 485 | 60 |
| TCGA-14-1043 | MALE | WHITE | 61 | 2004 | Dead | 24 | 24 | 40 |
| TCGA-14-1395 | MALE | WHITE | 52 | 2003 | Dead | 42 | 42 | 80 |
| TCGA-14-1450 | FEMALE | BLACK OR AFRICAN AMERICAN | 57 | 2005 | Alive | 1788 | N/A | 80 |
| TCGA-14-1456 | MALE | WHITE | 23 | 2006 | Alive | 1246 | N/A | 80 |
| TCGA-14-1823 | FEMALE | WHITE | 58 | 2007 | Dead | 543 | 543 | 80 |
| TCGA-14-1825 | MALE | WHITE | 70 | 2007 | Dead | N/A | 232 | 80 |
| TCGA-14-1829 | MALE | BLACK OR AFRICAN AMERICAN | 57 | 2009 | Alive | 218 | N/A | 60 |
| TCGA-14-2554 | FEMALE | WHITE | 52 | 2002 | Dead | 532 | 532 | 60 |
| TCGA-14-3476 | MALE | WHITE | 74 | 2009 | Dead | 12 | 12 | N/A |
| TCGA-14-4157 | MALE | BLACK OR AFRICAN AMERICAN | 40 | 2010 | Alive | 104 | N/A | 60 |
| TCGA-15-0742 | MALE | WHITE | 65 | 2005 | Dead | N/A | 419 | 80 |
| TCGA-15-1444 | MALE | WHITE | 21 | 2004 | Dead | N/A | 1537 | [Unknown] |
| TCGA-16-0846 | MALE | WHITE | 85 | 2006 | Dead | 119 | 119 | N/A |
| TCGA-16-0848 | MALE | WHITE | 57 | 2007 | Dead | 302 | 535 | N/A |
| TCGA-16-0861 | MALE | WHITE | 65 | 2008 | N/A | 131 | N/A | N/A |
| TCGA-16-1045 | FEMALE | WHITE | 49 | 2006 | Dead | 883 | 883 | N/A |
| TCGA-16-1048 | N/A | N/A | N/A | N/A | N/A | N/A | N/A | N/A |
| TCGA-19-1390 | FEMALE | WHITE | 63 | 2007 | Dead | 772 | 772 | 60 |
| TCGA-19-1787 | MALE | WHITE | 48 | 2008 | Dead | 385 | 385 | 80 |
| TCGA-19-1790 | MALE | WHITE | 56 | 2008 | Dead | 154 | 154 | 60 |
| TCGA-19-2619 | FEMALE | BLACK OR AFRICAN AMERICAN | 55 | 2009 | Alive | 294 | N/A | 40 |
| TCGA-19-2620 | MALE | WHITE | 70 | 2009 | Dead | 148 | 148 | 40 |
| TCGA-19-2623 | MALE | WHITE | 65 | 2009 | Alive | 229 | N/A | 80 |
| TCGA-19-2624 | MALE | WHITE | 51 | 2009 | Dead | 5 | 5 | N/A |
| TCGA-19-2625 | FEMALE | WHITE | 76 | 2009 | Dead | 124 | 124 | N/A |
| TCGA-19-2631 | FEMALE | WHITE | 74 | 2009 | Dead | 213 | 213 | 60 |
| TCGA-19-4065 | MALE | WHITE | 36 | 2009 | Alive | 214 | N/A | N/A |
| TCGA-19-4068 | FEMALE | WHITE | 68 | 2009 | Alive | 137 | N/A | 80 |
| TCGA-19-5947 | FEMALE | BLACK OR AFRICAN AMERICAN | 47 | 2010 | Dead | 202 | 202 | 40 |
| TCGA-19-5950 | FEMALE | WHITE | 52 | 2010 | Alive | 343 | N/A | 100 |
| TCGA-19-5951 | FEMALE | WHITE | 76 | 2010 | Dead | 244 | 244 | 80 |
| TCGA-19-5952 | MALE | WHITE | 62 | 2010 | Dead | 567 | 575 | 60 |
| TCGA-19-5953 | MALE | WHITE | 58 | 2010 | Dead | 144 | 144 | N/A |
| TCGA-19-5954 | FEMALE | WHITE | 72 | 2010 | Alive | 242 | N/A | 60 |
| TCGA-19-5955 | MALE | WHITE | 83 | 2010 | Dead | 54 | 54 | N/A |
| TCGA-19-5956 | FEMALE | WHITE | 53 | 2010 | Alive | 198 | N/A | 80 |
| TCGA-19-5958 | MALE | WHITE | 56 | 2010 | Alive | 164 | N/A | 80 |
| TCGA-19-5959 | FEMALE | WHITE | 77 | 2010 | Alive | 161 | N/A | 80 |
| TCGA-19-5960 | MALE | WHITE | 56 | 2010 | Alive | 165 | N/A | 80 |
| TCGA-19-A60I | MALE | BLACK OR AFRICAN AMERICAN | 39 | 2012 | Alive | 206 | N/A | [Not Evaluated] |
| TCGA-19-A6J4 | MALE | BLACK OR AFRICAN AMERICAN | 68 | 2013 | Dead | N/A | 121 | [Not Evaluated] |
| TCGA-19-A6J5 | MALE | BLACK OR AFRICAN AMERICAN | 40 | 2012 | Alive | 504 | N/A | 100 |
| TCGA-26-1439 | MALE | WHITE | 63 | 2007 | Dead | N/A | 422 | N/A |
| TCGA-26-1442 | MALE | WHITE | 43 | 2008 | Alive | 953 | N/A | 80 |
| TCGA-26-5132 | MALE | WHITE | 74 | 2009 | Alive | 286 | N/A | 60 |
| TCGA-26-5133 | MALE | WHITE | 59 | 2009 | Alive | 452 | N/A | 80 |
| TCGA-26-5134 | MALE | WHITE | 74 | 2009 | Alive | 167 | N/A | 60 |
| TCGA-26-5135 | FEMALE | WHITE | 72 | 2009 | Dead | N/A | 270 | N/A |
| TCGA-26-5136 | FEMALE | WHITE | 78 | 2009 | Alive | 37 | N/A | N/A |
| TCGA-26-6173 | MALE | WHITE | 57 | 2010 | Alive | 241 | N/A | 80 |
| TCGA-26-6174 | FEMALE | WHITE | 65 | 2011 | Alive | 71 | N/A | 80 |
| TCGA-26-A7UX | MALE | BLACK OR AFRICAN AMERICAN | 47 | 2013 | Alive | 260 | N/A | [Not Evaluated] |
| TCGA-27-1830 | MALE | WHITE | 57 | 2007 | Dead | 146 | 154 | 80 |
| TCGA-27-1832 | FEMALE | WHITE | 59 | 2007 | Dead | 0 | 300 | 100 |
| TCGA-27-1833 | FEMALE | WHITE | 67 | 2006 | Dead | 555 | 737 | 80 |
| TCGA-27-1834 | MALE | WHITE | 56 | 2006 | Dead | 1008 | 1233 | 80 |
| TCGA-27-1835 | FEMALE | WHITE | 53 | 2007 | Dead | 648 | 648 | 80 |
| TCGA-27-1836 | FEMALE | WHITE | 33 | 2007 | Dead | N/A | 914 | 80 |
| TCGA-27-1837 | MALE | WHITE | 36 | 2007 | Dead | 427 | 427 | 80 |
| TCGA-27-1838 | FEMALE | WHITE | 59 | 2008 | Dead | 350 | 350 | 80 |
| TCGA-27-2518 | MALE | WHITE | 52 | 2007 | Dead | 753 | 753 | 80 |
| TCGA-27-2519 | MALE | WHITE | 48 | 2009 | Alive | 316 | N/A | 80 |
| TCGA-27-2521 | MALE | WHITE | 34 | 2009 | Alive | 316 | N/A | 80 |
| TCGA-27-2523 | MALE | WHITE | 63 | 2005 | Dead | 489 | 489 | 80 |
| TCGA-27-2524 | MALE | WHITE | 56 | 2008 | Dead | 231 | 231 | 80 |
| TCGA-27-2526 | FEMALE | WHITE | 79 | 2007 | Dead | 87 | 87 | 40 |
| TCGA-27-2528 | MALE | WHITE | 62 | 2008 | Dead | 480 | 480 | 80 |
| TCGA-28-1747 | MALE | WHITE | 44 | 2008 | Dead | 77 | 77 | N/A |
| TCGA-28-1753 | MALE | WHITE | 53 | 2009 | Alive | 37 | N/A | N/A |
| TCGA-28-2499 | MALE | WHITE | 59 | 2009 | N/A | 95 | N/A | N/A |
| TCGA-28-2502 | MALE | WHITE | 65 | 2009 | Alive | 20 | N/A | 20 |
| TCGA-28-2509 | FEMALE | WHITE | 77 | 2009 | Alive | 145 | N/A | 80 |
| TCGA-28-2513 | FEMALE | WHITE | 69 | 2009 | Alive | 222 | N/A | 80 |
| TCGA-28-2514 | MALE | ASIAN | 45 | 2009 | Alive | 160 | N/A | 60 |
| TCGA-28-5204 | MALE | WHITE | 72 | 2009 | Dead | N/A | 454 | 80 |
| TCGA-28-5207 | MALE | WHITE | 71 | 2010 | Dead | 275 | 343 | 70 |
| TCGA-28-5208 | MALE | WHITE | 52 | 2010 | Alive | 474 | N/A | 70 |
| TCGA-28-5209 | FEMALE | WHITE | 66 | 2010 | Alive | 77 | N/A | N/A |
| TCGA-28-5213 | MALE | WHITE | 72 | 2010 | Alive | 298 | N/A | 80 |
| TCGA-28-5214 | MALE | WHITE | 53 | 2010 | Alive | 432 | N/A | 70 |
| TCGA-28-5215 | FEMALE | WHITE | 62 | 2010 | Dead | 237 | 335 | 90 |
| TCGA-28-5216 | MALE | WHITE | 52 | 2010 | Alive | 415 | N/A | 80 |
| TCGA-28-5218 | MALE | WHITE | 63 | 2010 | Dead | 128 | 157 | N/A |
| TCGA-28-5219 | FEMALE | WHITE | 47 | 2010 | Alive | 259 | N/A | 70 |
| TCGA-28-5220 | MALE | WHITE | 67 | 2010 | Alive | 319 | N/A | 90 |
| TCGA-28-6450 | MALE | WHITE | 60 | 2010 | Dead | 165 | 165 | N/A |
| TCGA-32-1970 | MALE | WHITE | 59 | 2005 | Dead | 468 | 468 | N/A |
| TCGA-32-1977 | FEMALE | WHITE | 63 | 2009 | Alive | 3 | N/A | N/A |
| TCGA-32-1979 | FEMALE | WHITE | 69 | 2008 | Dead | 593 | 593 | N/A |
| TCGA-32-1980 | MALE | WHITE | 72 | 2008 | Dead | 36 | 36 | N/A |
| TCGA-32-1982 | FEMALE | WHITE | 76 | 2008 | Dead | 142 | 142 | 80 |
| TCGA-32-1986 | MALE | WHITE | 68 | 2008 | Dead | 386 | 386 | 20 |
| TCGA-32-1991 | MALE | WHITE | 60 | 2009 | Dead | 515 | 515 | N/A |
| TCGA-32-2491 | MALE | WHITE | 63 | 2005 | Dead | 372 | 372 | N/A |
| TCGA-32-2494 | FEMALE | WHITE | 58 | 2008 | Dead | 632 | 632 | N/A |
| TCGA-32-2495 | FEMALE | WHITE | 59 | 2008 | Dead | 457 | 457 | N/A |
| TCGA-32-2615 | MALE | WHITE | 62 | 2009 | Dead | 485 | 485 | 80 |
| TCGA-32-2616 | FEMALE | WHITE | 48 | 2008 | Dead | 224 | 224 | N/A |
| TCGA-32-2634 | MALE | WHITE | 82 | 2009 | Alive | 270 | N/A | N/A |
| TCGA-32-4208 | MALE | WHITE | 25 | 2009 | Alive | 400 | N/A | N/A |
| TCGA-32-4209 | MALE | WHITE | 40 | 2009 | Alive | 338 | N/A | N/A |
| TCGA-32-4210 | MALE | WHITE | 73 | 2010 | Dead | 113 | 113 | N/A |
| TCGA-32-4211 | MALE | WHITE | 56 | 2010 | Dead | 383 | 383 | N/A |
| TCGA-32-4719 | MALE | WHITE | 73 | 2010 | Dead | 330 | 330 | N/A |
| TCGA-32-5222 | MALE | WHITE | 66 | 2010 | Alive | 165 | N/A | N/A |
| TCGA-41-2571 | MALE | WHITE | 89 | 2009 | Dead | 26 | 26 | 60 |
| TCGA-41-2572 | MALE | WHITE | 67 | 2009 | Dead | 406 | 406 | N/A |
| TCGA-41-2573 | MALE | WHITE | 59 | 2009 | Alive | 272 | N/A | 60 |
| TCGA-41-2575 | MALE | WHITE | 75 | 2009 | Dead | 290 | 290 | 60 |
| TCGA-41-3392 | MALE | WHITE | 88 | 2009 | Dead | 30 | 30 | N/A |
| TCGA-41-3393 | FEMALE | WHITE | 81 | 2009 | Dead | 135 | 135 | N/A |
| TCGA-41-3915 | MALE | WHITE | 48 | 2010 | Alive | 184 | N/A | N/A |
| TCGA-41-4097 | FEMALE | WHITE | 63 | 2010 | Dead | 6 | 6 | N/A |
| TCGA-41-5651 | FEMALE | BLACK OR AFRICAN AMERICAN | 59 | 2010 | Alive | 351 | N/A | N/A |
| TCGA-41-6646 | FEMALE | WHITE | 73 | 2011 | Alive | 236 | N/A | N/A |
| TCGA-4W-AA9R | MALE | BLACK OR AFRICAN AMERICAN | 61 | 2012 | Alive | 124 | N/A | N/A |
| TCGA-4W-AA9S | MALE | BLACK OR AFRICAN AMERICAN | 69 | 2013 | Alive | 44 | N/A | N/A |
| TCGA-74-6573 | MALE | N/A | 67 | 2009 | Dead | N/A | 105 | 100 |
| TCGA-74-6575 | FEMALE | N/A | 73 | 2009 | Alive | 534 | N/A | 90 |
| TCGA-74-6577 | MALE | N/A | 51 | 2010 | Alive | 132 | N/A | 90 |
| TCGA-74-6578 | MALE | N/A | 58 | 2010 | Alive | 436 | N/A | 100 |
| TCGA-74-6581 | MALE | N/A | 77 | 2010 | Alive | 250 | N/A | 100 |
| TCGA-74-6584 | FEMALE | N/A | 55 | 2010 | Alive | 228 | N/A | 80 |
| TCGA-76-4925 | MALE | WHITE | 76 | 2005 | Dead | 146 | 146 | 100 |
| TCGA-76-4926 | MALE | WHITE | 68 | 2005 | Dead | 138 | 138 | 80 |
| TCGA-76-4927 | MALE | WHITE | 58 | 2005 | Dead | 535 | 535 | 80 |
| TCGA-76-4928 | FEMALE | WHITE | 85 | 2005 | Dead | 94 | 94 | 80 |
| TCGA-76-4929 | FEMALE | WHITE | 76 | 2005 | Dead | 111 | 111 | 80 |
| TCGA-76-4931 | FEMALE | WHITE | 70 | 2005 | Dead | 279 | 279 | 80 |
| TCGA-76-4932 | FEMALE | WHITE | 50 | 2006 | Dead | 1458 | 1458 | 80 |
| TCGA-76-4935 | FEMALE | WHITE | 52 | 2010 | Alive | 328 | N/A | 80 |
| TCGA-76-6191 | MALE | WHITE | 57 | 2009 | Dead | 508 | 508 | 80 |
| TCGA-76-6192 | MALE | WHITE | 74 | 2010 | Dead | 100 | 100 | 80 |
| TCGA-76-6193 | MALE | N/A | 78 | 2010 | Dead | 82 | 82 | 60 |
| TCGA-76-6280 | MALE | WHITE | 57 | 2007 | Dead | 346 | 346 | 80 |
| TCGA-76-6282 | MALE | WHITE | 63 | 2007 | Dead | 519 | 519 | 80 |
| TCGA-76-6283 | FEMALE | WHITE | 71 | 2007 | Dead | N/A | 165 | 0 |
| TCGA-76-6285 | FEMALE | WHITE | 64 | 2008 | Dead | 254 | 254 | 80 |
| TCGA-76-6286 | MALE | WHITE | 60 | 2009 | Dead | 638 | 638 | 80 |
| TCGA-76-6656 | MALE | BLACK OR AFRICAN AMERICAN | 66 | 2010 | Dead | 147 | 147 | 60 |
| TCGA-76-6657 | MALE | WHITE | 74 | 2010 | Dead | 153 | 153 | 80 |
| TCGA-76-6660 | MALE | WHITE | 73 | 2010 | Dead | N/A | 114 | 0 |
| TCGA-76-6661 | MALE | WHITE | 54 | 2011 | Alive | 7 | N/A | 60 |
| TCGA-76-6662 | MALE | WHITE | 58 | 2011 | Alive | 282 | N/A | 80 |
| TCGA-76-6663 | FEMALE | WHITE | 44 | 2011 | Alive | 235 | N/A | 80 |
| TCGA-76-6664 | FEMALE | WHITE | 49 | 2011 | Alive | 237 | N/A | 80 |
| TCGA-81-5910 | MALE | WHITE | 64 | 2009 | Dead | N/A | 49 | 40 |
| TCGA-81-5911 | MALE | WHITE | 33 | 2010 | Alive | 539 | N/A | N/A |
| TCGA-87-5896 | FEMALE | WHITE | 50 | 2010 | Alive | 2 | N/A | N/A |
| TCGA-OX-A56R | MALE | BLACK OR AFRICAN AMERICAN | 68 | 2012 | Dead | N/A | 180 | N/A |
| TCGA-RR-A6KA | FEMALE | BLACK OR AFRICAN AMERICAN | 72 | 2012 | Dead | N/A | 191 | [Unknown] |

**Table SIII. Description of the 2504 control population from 1000 Genome Project.**

| **SampleID** | **Population** | **Gender** |  | **SampleID** | **Population** | **Gender** |  | **SampleID** | **Population** | **Gender** |
| --- | --- | --- | --- | --- | --- | --- | --- | --- | --- | --- |
| HG00096 | EUR | male |  | HG02188 | EAS | female |  | NA11829 | EUR | male |
| HG00097 | EUR | female |  | HG02190 | EAS | female |  | NA11830 | EUR | female |
| HG00099 | EUR | female |  | HG02215 | EUR | female |  | NA11831 | EUR | male |
| HG00100 | EUR | female |  | HG02219 | EUR | male |  | NA11832 | EUR | female |
| HG00101 | EUR | male |  | HG02220 | EUR | female |  | NA11840 | EUR | female |
| HG00102 | EUR | female |  | HG02221 | EUR | male |  | NA11843 | EUR | male |
| HG00103 | EUR | male |  | HG02223 | EUR | female |  | NA11881 | EUR | male |
| HG00105 | EUR | male |  | HG02224 | EUR | male |  | NA11892 | EUR | female |
| HG00106 | EUR | female |  | HG02230 | EUR | female |  | NA11893 | EUR | male |
| HG00107 | EUR | male |  | HG02231 | EUR | male |  | NA11894 | EUR | female |
| HG00108 | EUR | male |  | HG02232 | EUR | female |  | NA11918 | EUR | female |
| HG00109 | EUR | male |  | HG02233 | EUR | male |  | NA11919 | EUR | male |
| HG00110 | EUR | female |  | HG02235 | EUR | female |  | NA11920 | EUR | female |
| HG00111 | EUR | female |  | HG02236 | EUR | male |  | NA11930 | EUR | male |
| HG00112 | EUR | male |  | HG02238 | EUR | male |  | NA11931 | EUR | female |
| HG00113 | EUR | male |  | HG02239 | EUR | female |  | NA11932 | EUR | male |
| HG00114 | EUR | male |  | HG02250 | EAS | male |  | NA11933 | EUR | female |
| HG00115 | EUR | male |  | HG02252 | AMR | female |  | NA11992 | EUR | male |
| HG00116 | EUR | male |  | HG02253 | AMR | male |  | NA11994 | EUR | male |
| HG00117 | EUR | male |  | HG02255 | AFR | male |  | NA11995 | EUR | female |
| HG00118 | EUR | female |  | HG02256 | AFR | female |  | NA12003 | EUR | male |
| HG00119 | EUR | male |  | HG02259 | AMR | male |  | NA12004 | EUR | female |
| HG00120 | EUR | female |  | HG02260 | AMR | female |  | NA12005 | EUR | male |
| HG00121 | EUR | female |  | HG02262 | AMR | male |  | NA12006 | EUR | female |
| HG00122 | EUR | female |  | HG02265 | AMR | male |  | NA12043 | EUR | male |
| HG00123 | EUR | female |  | HG02266 | AMR | female |  | NA12044 | EUR | female |
| HG00125 | EUR | female |  | HG02271 | AMR | male |  | NA12045 | EUR | male |
| HG00126 | EUR | male |  | HG02272 | AMR | female |  | NA12046 | EUR | female |
| HG00127 | EUR | female |  | HG02274 | AMR | male |  | NA12058 | EUR | female |
| HG00128 | EUR | female |  | HG02275 | AMR | female |  | NA12144 | EUR | male |
| HG00129 | EUR | male |  | HG02277 | AMR | male |  | NA12154 | EUR | male |
| HG00130 | EUR | female |  | HG02278 | AMR | female |  | NA12155 | EUR | male |
| HG00131 | EUR | male |  | HG02281 | AFR | male |  | NA12156 | EUR | female |
| HG00132 | EUR | female |  | HG02282 | AFR | female |  | NA12234 | EUR | female |
| HG00133 | EUR | female |  | HG02283 | AFR | male |  | NA12249 | EUR | female |
| HG00136 | EUR | male |  | HG02284 | AFR | male |  | NA12272 | EUR | male |
| HG00137 | EUR | female |  | HG02285 | AMR | male |  | NA12273 | EUR | female |
| HG00138 | EUR | male |  | HG02286 | AMR | female |  | NA12275 | EUR | female |
| HG00139 | EUR | male |  | HG02291 | AMR | male |  | NA12282 | EUR | male |
| HG00140 | EUR | male |  | HG02292 | AMR | female |  | NA12283 | EUR | female |
| HG00141 | EUR | male |  | HG02298 | AMR | female |  | NA12286 | EUR | male |
| HG00142 | EUR | male |  | HG02299 | AMR | male |  | NA12287 | EUR | female |
| HG00143 | EUR | male |  | HG02301 | AMR | female |  | NA12340 | EUR | male |
| HG00145 | EUR | male |  | HG02304 | AMR | male |  | NA12341 | EUR | female |
| HG00146 | EUR | female |  | HG02307 | AFR | male |  | NA12342 | EUR | male |
| HG00148 | EUR | male |  | HG02308 | AFR | female |  | NA12347 | EUR | male |
| HG00149 | EUR | male |  | HG02309 | AFR | female |  | NA12348 | EUR | female |
| HG00150 | EUR | female |  | HG02312 | AMR | female |  | NA12383 | EUR | female |
| HG00151 | EUR | male |  | HG02314 | AFR | male |  | NA12399 | EUR | male |
| HG00154 | EUR | female |  | HG02315 | AFR | female |  | NA12400 | EUR | female |
| HG00155 | EUR | male |  | HG02317 | AFR | male |  | NA12413 | EUR | male |
| HG00157 | EUR | male |  | HG02318 | AFR | female |  | NA12414 | EUR | female |
| HG00158 | EUR | female |  | HG02322 | AFR | female |  | NA12489 | EUR | female |
| HG00159 | EUR | male |  | HG02323 | AFR | male |  | NA12546 | EUR | male |
| HG00160 | EUR | male |  | HG02325 | AFR | female |  | NA12716 | EUR | male |
| HG00171 | EUR | female |  | HG02330 | AFR | male |  | NA12717 | EUR | female |
| HG00173 | EUR | female |  | HG02332 | AFR | male |  | NA12718 | EUR | female |
| HG00174 | EUR | female |  | HG02334 | AFR | male |  | NA12748 | EUR | male |
| HG00176 | EUR | female |  | HG02337 | AFR | female |  | NA12749 | EUR | female |
| HG00177 | EUR | female |  | HG02339 | AFR | female |  | NA12750 | EUR | male |
| HG00178 | EUR | female |  | HG02343 | AFR | male |  | NA12751 | EUR | female |
| HG00179 | EUR | female |  | HG02345 | AMR | female |  | NA12760 | EUR | male |
| HG00180 | EUR | female |  | HG02348 | AMR | female |  | NA12761 | EUR | female |
| HG00181 | EUR | male |  | HG02351 | EAS | male |  | NA12762 | EUR | male |
| HG00182 | EUR | male |  | HG02353 | EAS | male |  | NA12763 | EUR | female |
| HG00183 | EUR | male |  | HG02355 | EAS | male |  | NA12775 | EUR | male |
| HG00185 | EUR | male |  | HG02356 | EAS | male |  | NA12776 | EUR | female |
| HG00186 | EUR | male |  | HG02360 | EAS | male |  | NA12777 | EUR | male |
| HG00187 | EUR | male |  | HG02364 | EAS | male |  | NA12778 | EUR | female |
| HG00188 | EUR | male |  | HG02367 | EAS | male |  | NA12812 | EUR | male |
| HG00189 | EUR | male |  | HG02371 | EAS | male |  | NA12813 | EUR | female |
| HG00190 | EUR | male |  | HG02373 | EAS | male |  | NA12814 | EUR | male |
| HG00231 | EUR | female |  | HG02374 | EAS | male |  | NA12815 | EUR | female |
| HG00232 | EUR | female |  | HG02375 | EAS | male |  | NA12827 | EUR | male |
| HG00233 | EUR | female |  | HG02379 | EAS | male |  | NA12828 | EUR | female |
| HG00234 | EUR | male |  | HG02380 | EAS | male |  | NA12829 | EUR | male |
| HG00235 | EUR | female |  | HG02382 | EAS | male |  | NA12830 | EUR | female |
| HG00236 | EUR | female |  | HG02383 | EAS | male |  | NA12842 | EUR | male |
| HG00237 | EUR | female |  | HG02384 | EAS | male |  | NA12843 | EUR | female |
| HG00238 | EUR | female |  | HG02385 | EAS | male |  | NA12872 | EUR | male |
| HG00239 | EUR | female |  | HG02386 | EAS | male |  | NA12873 | EUR | female |
| HG00240 | EUR | female |  | HG02389 | EAS | male |  | NA12874 | EUR | male |
| HG00242 | EUR | male |  | HG02390 | EAS | male |  | NA12878 | EUR | female |
| HG00243 | EUR | male |  | HG02391 | EAS | male |  | NA12889 | EUR | male |
| HG00244 | EUR | male |  | HG02392 | EAS | male |  | NA12890 | EUR | female |
| HG00245 | EUR | female |  | HG02394 | EAS | male |  | NA18486 | AFR | male |
| HG00246 | EUR | male |  | HG02395 | EAS | male |  | NA18488 | AFR | female |
| HG00250 | EUR | female |  | HG02396 | EAS | male |  | NA18489 | AFR | female |
| HG00251 | EUR | male |  | HG02397 | EAS | male |  | NA18498 | AFR | male |
| HG00252 | EUR | male |  | HG02398 | EAS | male |  | NA18499 | AFR | female |
| HG00253 | EUR | female |  | HG02399 | EAS | male |  | NA18501 | AFR | male |
| HG00254 | EUR | female |  | HG02401 | EAS | male |  | NA18502 | AFR | female |
| HG00255 | EUR | female |  | HG02402 | EAS | male |  | NA18504 | AFR | male |
| HG00256 | EUR | male |  | HG02406 | EAS | male |  | NA18505 | AFR | female |
| HG00257 | EUR | female |  | HG02407 | EAS | male |  | NA18507 | AFR | male |
| HG00258 | EUR | female |  | HG02408 | EAS | male |  | NA18508 | AFR | female |
| HG00259 | EUR | female |  | HG02409 | EAS | male |  | NA18510 | AFR | male |
| HG00260 | EUR | male |  | HG02410 | EAS | male |  | NA18511 | AFR | female |
| HG00261 | EUR | female |  | HG02419 | AFR | female |  | NA18516 | AFR | male |
| HG00262 | EUR | female |  | HG02420 | AFR | male |  | NA18517 | AFR | female |
| HG00263 | EUR | female |  | HG02425 | AMR | female |  | NA18519 | AFR | male |
| HG00264 | EUR | male |  | HG02427 | AFR | female |  | NA18520 | AFR | female |
| HG00265 | EUR | male |  | HG02429 | AFR | male |  | NA18522 | AFR | male |
| HG00266 | EUR | female |  | HG02433 | AFR | male |  | NA18523 | AFR | female |
| HG00267 | EUR | male |  | HG02439 | AFR | male |  | NA18525 | EAS | female |
| HG00268 | EUR | female |  | HG02442 | AFR | male |  | NA18526 | EAS | female |
| HG00269 | EUR | female |  | HG02445 | AFR | male |  | NA18528 | EAS | female |
| HG00271 | EUR | male |  | HG02449 | AFR | male |  | NA18530 | EAS | male |
| HG00272 | EUR | female |  | HG02450 | AFR | female |  | NA18531 | EAS | female |
| HG00273 | EUR | male |  | HG02455 | AFR | male |  | NA18532 | EAS | female |
| HG00274 | EUR | female |  | HG02461 | AFR | male |  | NA18533 | EAS | female |
| HG00275 | EUR | female |  | HG02462 | AFR | female |  | NA18534 | EAS | male |
| HG00276 | EUR | female |  | HG02464 | AFR | male |  | NA18535 | EAS | female |
| HG00277 | EUR | male |  | HG02465 | AFR | female |  | NA18536 | EAS | male |
| HG00278 | EUR | male |  | HG02470 | AFR | male |  | NA18537 | EAS | female |
| HG00280 | EUR | male |  | HG02471 | AFR | female |  | NA18538 | EAS | female |
| HG00281 | EUR | female |  | HG02476 | AFR | female |  | NA18539 | EAS | female |
| HG00282 | EUR | female |  | HG02477 | AFR | female |  | NA18541 | EAS | female |
| HG00284 | EUR | male |  | HG02479 | AFR | female |  | NA18542 | EAS | female |
| HG00285 | EUR | female |  | HG02481 | AFR | male |  | NA18543 | EAS | male |
| HG00288 | EUR | female |  | HG02484 | AFR | male |  | NA18544 | EAS | male |
| HG00290 | EUR | male |  | HG02485 | AFR | female |  | NA18545 | EAS | female |
| HG00304 | EUR | female |  | HG02489 | AFR | male |  | NA18546 | EAS | male |
| HG00306 | EUR | female |  | HG02490 | SAS | male |  | NA18547 | EAS | female |
| HG00308 | EUR | male |  | HG02491 | SAS | female |  | NA18548 | EAS | male |
| HG00309 | EUR | female |  | HG02493 | SAS | male |  | NA18549 | EAS | male |
| HG00310 | EUR | male |  | HG02494 | SAS | female |  | NA18550 | EAS | female |
| HG00311 | EUR | male |  | HG02496 | AFR | male |  | NA18552 | EAS | female |
| HG00313 | EUR | female |  | HG02497 | AFR | female |  | NA18553 | EAS | female |
| HG00315 | EUR | female |  | HG02501 | AFR | male |  | NA18555 | EAS | female |
| HG00318 | EUR | female |  | HG02502 | AFR | female |  | NA18557 | EAS | male |
| HG00319 | EUR | female |  | HG02505 | AFR | female |  | NA18558 | EAS | male |
| HG00320 | EUR | female |  | HG02508 | AFR | female |  | NA18559 | EAS | male |
| HG00321 | EUR | male |  | HG02511 | AFR | female |  | NA18560 | EAS | female |
| HG00323 | EUR | female |  | HG02512 | EAS | male |  | NA18561 | EAS | male |
| HG00324 | EUR | female |  | HG02513 | EAS | female |  | NA18562 | EAS | male |
| HG00325 | EUR | male |  | HG02521 | EAS | male |  | NA18563 | EAS | male |
| HG00326 | EUR | female |  | HG02522 | EAS | female |  | NA18564 | EAS | female |
| HG00327 | EUR | female |  | HG02536 | AFR | male |  | NA18565 | EAS | female |
| HG00328 | EUR | female |  | HG02537 | AFR | female |  | NA18566 | EAS | female |
| HG00329 | EUR | male |  | HG02541 | AFR | male |  | NA18567 | EAS | female |
| HG00330 | EUR | female |  | HG02545 | AFR | male |  | NA18570 | EAS | female |
| HG00331 | EUR | female |  | HG02546 | AFR | female |  | NA18571 | EAS | female |
| HG00332 | EUR | female |  | HG02549 | AFR | female |  | NA18572 | EAS | male |
| HG00334 | EUR | female |  | HG02554 | AFR | male |  | NA18573 | EAS | female |
| HG00335 | EUR | male |  | HG02555 | AFR | female |  | NA18574 | EAS | female |
| HG00336 | EUR | male |  | HG02557 | AFR | male |  | NA18577 | EAS | female |
| HG00337 | EUR | female |  | HG02558 | AFR | female |  | NA18579 | EAS | female |
| HG00338 | EUR | male |  | HG02561 | AFR | male |  | NA18582 | EAS | female |
| HG00339 | EUR | female |  | HG02562 | AFR | female |  | NA18591 | EAS | female |
| HG00341 | EUR | male |  | HG02568 | AFR | female |  | NA18592 | EAS | female |
| HG00342 | EUR | male |  | HG02570 | AFR | male |  | NA18593 | EAS | female |
| HG00343 | EUR | female |  | HG02571 | AFR | female |  | NA18595 | EAS | female |
| HG00344 | EUR | female |  | HG02573 | AFR | male |  | NA18596 | EAS | female |
| HG00345 | EUR | male |  | HG02574 | AFR | female |  | NA18597 | EAS | female |
| HG00346 | EUR | female |  | HG02577 | AFR | female |  | NA18599 | EAS | female |
| HG00349 | EUR | female |  | HG02580 | AFR | female |  | NA18602 | EAS | female |
| HG00350 | EUR | female |  | HG02582 | AFR | male |  | NA18603 | EAS | male |
| HG00351 | EUR | male |  | HG02583 | AFR | female |  | NA18605 | EAS | male |
| HG00353 | EUR | female |  | HG02585 | AFR | male |  | NA18606 | EAS | male |
| HG00355 | EUR | female |  | HG02586 | AFR | female |  | NA18608 | EAS | male |
| HG00356 | EUR | female |  | HG02588 | AFR | male |  | NA18609 | EAS | male |
| HG00357 | EUR | female |  | HG02589 | AFR | female |  | NA18610 | EAS | female |
| HG00358 | EUR | male |  | HG02594 | AFR | male |  | NA18611 | EAS | male |
| HG00360 | EUR | male |  | HG02595 | AFR | female |  | NA18612 | EAS | male |
| HG00361 | EUR | female |  | HG02597 | SAS | male |  | NA18613 | EAS | male |
| HG00362 | EUR | female |  | HG02600 | SAS | male |  | NA18614 | EAS | female |
| HG00364 | EUR | female |  | HG02601 | SAS | female |  | NA18615 | EAS | female |
| HG00365 | EUR | female |  | HG02603 | SAS | male |  | NA18616 | EAS | female |
| HG00366 | EUR | male |  | HG02604 | SAS | female |  | NA18617 | EAS | female |
| HG00367 | EUR | female |  | HG02610 | AFR | male |  | NA18618 | EAS | female |
| HG00368 | EUR | female |  | HG02611 | AFR | female |  | NA18619 | EAS | female |
| HG00369 | EUR | male |  | HG02613 | AFR | male |  | NA18620 | EAS | male |
| HG00371 | EUR | male |  | HG02614 | AFR | female |  | NA18621 | EAS | male |
| HG00372 | EUR | male |  | HG02620 | AFR | male |  | NA18622 | EAS | male |
| HG00373 | EUR | female |  | HG02621 | AFR | female |  | NA18623 | EAS | male |
| HG00375 | EUR | male |  | HG02623 | AFR | male |  | NA18624 | EAS | male |
| HG00376 | EUR | female |  | HG02624 | AFR | female |  | NA18625 | EAS | female |
| HG00378 | EUR | female |  | HG02628 | AFR | male |  | NA18626 | EAS | female |
| HG00379 | EUR | female |  | HG02629 | AFR | female |  | NA18627 | EAS | female |
| HG00380 | EUR | female |  | HG02634 | AFR | male |  | NA18628 | EAS | female |
| HG00381 | EUR | female |  | HG02635 | AFR | female |  | NA18629 | EAS | male |
| HG00382 | EUR | male |  | HG02642 | AFR | male |  | NA18630 | EAS | female |
| HG00383 | EUR | female |  | HG02643 | AFR | female |  | NA18631 | EAS | female |
| HG00384 | EUR | female |  | HG02645 | AFR | male |  | NA18632 | EAS | male |
| HG00403 | EAS | male |  | HG02646 | AFR | female |  | NA18633 | EAS | male |
| HG00404 | EAS | female |  | HG02648 | SAS | male |  | NA18634 | EAS | female |
| HG00406 | EAS | male |  | HG02649 | SAS | female |  | NA18635 | EAS | male |
| HG00407 | EAS | female |  | HG02651 | SAS | male |  | NA18636 | EAS | male |
| HG00409 | EAS | male |  | HG02652 | SAS | female |  | NA18637 | EAS | male |
| HG00410 | EAS | female |  | HG02654 | SAS | male |  | NA18638 | EAS | male |
| HG00419 | EAS | female |  | HG02655 | SAS | female |  | NA18639 | EAS | male |
| HG00421 | EAS | male |  | HG02657 | SAS | male |  | NA18640 | EAS | female |
| HG00422 | EAS | female |  | HG02658 | SAS | female |  | NA18641 | EAS | female |
| HG00428 | EAS | female |  | HG02660 | SAS | male |  | NA18642 | EAS | female |
| HG00436 | EAS | male |  | HG02661 | SAS | female |  | NA18643 | EAS | male |
| HG00437 | EAS | female |  | HG02666 | AFR | male |  | NA18644 | EAS | female |
| HG00442 | EAS | male |  | HG02667 | AFR | female |  | NA18645 | EAS | male |
| HG00443 | EAS | female |  | HG02675 | AFR | male |  | NA18646 | EAS | female |
| HG00445 | EAS | male |  | HG02676 | AFR | female |  | NA18647 | EAS | male |
| HG00446 | EAS | female |  | HG02678 | AFR | male |  | NA18648 | EAS | male |
| HG00448 | EAS | male |  | HG02679 | AFR | female |  | NA18740 | EAS | male |
| HG00449 | EAS | female |  | HG02681 | SAS | male |  | NA18745 | EAS | male |
| HG00451 | EAS | male |  | HG02682 | SAS | female |  | NA18747 | EAS | male |
| HG00452 | EAS | female |  | HG02684 | SAS | male |  | NA18748 | EAS | male |
| HG00457 | EAS | male |  | HG02685 | SAS | female |  | NA18749 | EAS | male |
| HG00458 | EAS | female |  | HG02687 | SAS | male |  | NA18757 | EAS | male |
| HG00463 | EAS | male |  | HG02688 | SAS | female |  | NA18853 | AFR | male |
| HG00464 | EAS | female |  | HG02690 | SAS | male |  | NA18856 | AFR | male |
| HG00472 | EAS | male |  | HG02691 | SAS | female |  | NA18858 | AFR | female |
| HG00473 | EAS | female |  | HG02694 | SAS | female |  | NA18861 | AFR | female |
| HG00475 | EAS | male |  | HG02696 | SAS | male |  | NA18864 | AFR | female |
| HG00476 | EAS | female |  | HG02697 | SAS | female |  | NA18865 | AFR | male |
| HG00478 | EAS | male |  | HG02699 | SAS | male |  | NA18867 | AFR | female |
| HG00479 | EAS | female |  | HG02700 | SAS | female |  | NA18868 | AFR | male |
| HG00500 | EAS | male |  | HG02702 | AFR | male |  | NA18870 | AFR | female |
| HG00513 | EAS | female |  | HG02703 | AFR | female |  | NA18871 | AFR | male |
| HG00524 | EAS | male |  | HG02715 | AFR | male |  | NA18873 | AFR | female |
| HG00525 | EAS | female |  | HG02716 | AFR | female |  | NA18874 | AFR | male |
| HG00530 | EAS | male |  | HG02721 | AFR | male |  | NA18876 | AFR | female |
| HG00531 | EAS | female |  | HG02722 | AFR | female |  | NA18877 | AFR | male |
| HG00533 | EAS | male |  | HG02724 | SAS | male |  | NA18878 | AFR | female |
| HG00534 | EAS | female |  | HG02725 | SAS | female |  | NA18879 | AFR | male |
| HG00536 | EAS | male |  | HG02727 | SAS | male |  | NA18881 | AFR | female |
| HG00537 | EAS | female |  | HG02728 | SAS | female |  | NA18907 | AFR | female |
| HG00542 | EAS | male |  | HG02731 | SAS | female |  | NA18908 | AFR | male |
| HG00543 | EAS | female |  | HG02733 | SAS | male |  | NA18909 | AFR | female |
| HG00551 | AMR | female |  | HG02734 | SAS | female |  | NA18910 | AFR | male |
| HG00553 | AMR | male |  | HG02736 | SAS | male |  | NA18912 | AFR | female |
| HG00554 | AMR | female |  | HG02737 | SAS | female |  | NA18915 | AFR | male |
| HG00556 | EAS | male |  | HG02756 | AFR | male |  | NA18916 | AFR | female |
| HG00557 | EAS | female |  | HG02757 | AFR | female |  | NA18917 | AFR | male |
| HG00559 | EAS | male |  | HG02759 | AFR | male |  | NA18923 | AFR | male |
| HG00560 | EAS | female |  | HG02760 | AFR | female |  | NA18924 | AFR | female |
| HG00565 | EAS | male |  | HG02763 | AFR | female |  | NA18933 | AFR | female |
| HG00566 | EAS | female |  | HG02768 | AFR | male |  | NA18934 | AFR | male |
| HG00580 | EAS | male |  | HG02769 | AFR | female |  | NA18939 | EAS | female |
| HG00581 | EAS | female |  | HG02771 | AFR | male |  | NA18940 | EAS | male |
| HG00583 | EAS | male |  | HG02772 | AFR | female |  | NA18941 | EAS | female |
| HG00584 | EAS | female |  | HG02774 | SAS | male |  | NA18942 | EAS | female |
| HG00589 | EAS | male |  | HG02775 | SAS | female |  | NA18943 | EAS | male |
| HG00590 | EAS | female |  | HG02778 | SAS | female |  | NA18944 | EAS | male |
| HG00592 | EAS | male |  | HG02780 | SAS | male |  | NA18945 | EAS | male |
| HG00593 | EAS | female |  | HG02783 | SAS | male |  | NA18946 | EAS | female |
| HG00595 | EAS | male |  | HG02784 | SAS | female |  | NA18947 | EAS | female |
| HG00596 | EAS | female |  | HG02786 | SAS | male |  | NA18948 | EAS | male |
| HG00598 | EAS | male |  | HG02787 | SAS | female |  | NA18949 | EAS | female |
| HG00599 | EAS | female |  | HG02789 | SAS | male |  | NA18950 | EAS | female |
| HG00607 | EAS | male |  | HG02790 | SAS | female |  | NA18951 | EAS | female |
| HG00608 | EAS | female |  | HG02792 | SAS | male |  | NA18952 | EAS | male |
| HG00610 | EAS | male |  | HG02793 | SAS | female |  | NA18953 | EAS | male |
| HG00611 | EAS | female |  | HG02798 | AFR | male |  | NA18954 | EAS | female |
| HG00613 | EAS | male |  | HG02799 | AFR | female |  | NA18956 | EAS | female |
| HG00614 | EAS | female |  | HG02804 | AFR | male |  | NA18957 | EAS | female |
| HG00619 | EAS | male |  | HG02805 | AFR | female |  | NA18959 | EAS | male |
| HG00620 | EAS | female |  | HG02807 | AFR | male |  | NA18960 | EAS | male |
| HG00622 | EAS | male |  | HG02808 | AFR | female |  | NA18961 | EAS | male |
| HG00623 | EAS | female |  | HG02810 | AFR | male |  | NA18962 | EAS | male |
| HG00625 | EAS | male |  | HG02811 | AFR | female |  | NA18963 | EAS | female |
| HG00626 | EAS | female |  | HG02813 | AFR | male |  | NA18964 | EAS | female |
| HG00628 | EAS | male |  | HG02814 | AFR | female |  | NA18965 | EAS | male |
| HG00629 | EAS | female |  | HG02816 | AFR | male |  | NA18966 | EAS | male |
| HG00631 | EAS | male |  | HG02817 | AFR | female |  | NA18967 | EAS | male |
| HG00632 | EAS | female |  | HG02819 | AFR | male |  | NA18968 | EAS | female |
| HG00634 | EAS | male |  | HG02820 | AFR | female |  | NA18969 | EAS | female |
| HG00637 | AMR | male |  | HG02836 | AFR | male |  | NA18970 | EAS | male |
| HG00638 | AMR | female |  | HG02837 | AFR | female |  | NA18971 | EAS | male |
| HG00640 | AMR | male |  | HG02839 | AFR | male |  | NA18972 | EAS | female |
| HG00641 | AMR | female |  | HG02840 | AFR | female |  | NA18973 | EAS | female |
| HG00650 | EAS | male |  | HG02851 | AFR | male |  | NA18974 | EAS | male |
| HG00651 | EAS | female |  | HG02852 | AFR | female |  | NA18975 | EAS | female |
| HG00653 | EAS | male |  | HG02854 | AFR | male |  | NA18976 | EAS | female |
| HG00654 | EAS | female |  | HG02855 | AFR | female |  | NA18977 | EAS | male |
| HG00656 | EAS | male |  | HG02860 | AFR | male |  | NA18978 | EAS | female |
| HG00657 | EAS | female |  | HG02861 | AFR | female |  | NA18979 | EAS | female |
| HG00662 | EAS | male |  | HG02870 | AFR | female |  | NA18980 | EAS | female |
| HG00663 | EAS | female |  | HG02878 | AFR | male |  | NA18981 | EAS | female |
| HG00671 | EAS | male |  | HG02879 | AFR | female |  | NA18982 | EAS | male |
| HG00672 | EAS | female |  | HG02881 | AFR | male |  | NA18983 | EAS | male |
| HG00674 | EAS | male |  | HG02882 | AFR | female |  | NA18984 | EAS | male |
| HG00675 | EAS | female |  | HG02884 | AFR | male |  | NA18985 | EAS | male |
| HG00683 | EAS | male |  | HG02885 | AFR | female |  | NA18986 | EAS | male |
| HG00684 | EAS | female |  | HG02887 | AFR | male |  | NA18987 | EAS | female |
| HG00689 | EAS | male |  | HG02888 | AFR | female |  | NA18988 | EAS | male |
| HG00690 | EAS | female |  | HG02890 | AFR | male |  | NA18989 | EAS | male |
| HG00692 | EAS | male |  | HG02891 | AFR | female |  | NA18990 | EAS | male |
| HG00693 | EAS | female |  | HG02895 | AFR | male |  | NA18991 | EAS | female |
| HG00698 | EAS | male |  | HG02896 | AFR | female |  | NA18992 | EAS | female |
| HG00699 | EAS | female |  | HG02922 | AFR | female |  | NA18993 | EAS | female |
| HG00701 | EAS | male |  | HG02923 | AFR | male |  | NA18994 | EAS | male |
| HG00704 | EAS | male |  | HG02938 | AFR | male |  | NA18995 | EAS | male |
| HG00705 | EAS | female |  | HG02941 | AFR | male |  | NA18997 | EAS | female |
| HG00707 | EAS | male |  | HG02943 | AFR | female |  | NA18998 | EAS | female |
| HG00708 | EAS | female |  | HG02944 | AFR | male |  | NA18999 | EAS | female |
| HG00717 | EAS | female |  | HG02946 | AFR | female |  | NA19000 | EAS | male |
| HG00728 | EAS | male |  | HG02947 | AFR | male |  | NA19001 | EAS | female |
| HG00729 | EAS | female |  | HG02952 | AFR | female |  | NA19002 | EAS | female |
| HG00731 | AMR | male |  | HG02953 | AFR | male |  | NA19003 | EAS | female |
| HG00732 | AMR | female |  | HG02968 | AFR | male |  | NA19004 | EAS | male |
| HG00734 | AMR | female |  | HG02970 | AFR | female |  | NA19005 | EAS | male |
| HG00736 | AMR | male |  | HG02971 | AFR | male |  | NA19006 | EAS | male |
| HG00737 | AMR | female |  | HG02973 | AFR | male |  | NA19007 | EAS | male |
| HG00739 | AMR | male |  | HG02974 | AFR | female |  | NA19009 | EAS | male |
| HG00740 | AMR | female |  | HG02976 | AFR | female |  | NA19010 | EAS | female |
| HG00742 | AMR | male |  | HG02977 | AFR | male |  | NA19011 | EAS | female |
| HG00743 | AMR | female |  | HG02979 | AFR | female |  | NA19012 | EAS | male |
| HG00759 | EAS | female |  | HG02981 | AFR | male |  | NA19017 | AFR | female |
| HG00766 | EAS | female |  | HG02982 | AFR | male |  | NA19019 | AFR | female |
| HG00844 | EAS | male |  | HG02983 | AFR | female |  | NA19020 | AFR | male |
| HG00851 | EAS | female |  | HG03006 | SAS | male |  | NA19023 | AFR | female |
| HG00864 | EAS | female |  | HG03007 | SAS | female |  | NA19024 | AFR | female |
| HG00867 | EAS | female |  | HG03009 | SAS | male |  | NA19025 | AFR | male |
| HG00879 | EAS | female |  | HG03012 | SAS | male |  | NA19026 | AFR | male |
| HG00881 | EAS | male |  | HG03015 | SAS | male |  | NA19027 | AFR | male |
| HG00956 | EAS | female |  | HG03016 | SAS | female |  | NA19028 | AFR | male |
| HG00978 | EAS | female |  | HG03018 | SAS | male |  | NA19030 | AFR | female |
| HG00982 | EAS | male |  | HG03019 | SAS | female |  | NA19031 | AFR | male |
| HG01028 | EAS | male |  | HG03021 | SAS | male |  | NA19035 | AFR | male |
| HG01029 | EAS | female |  | HG03022 | SAS | female |  | NA19036 | AFR | female |
| HG01031 | EAS | male |  | HG03024 | AFR | male |  | NA19037 | AFR | female |
| HG01046 | EAS | female |  | HG03025 | AFR | female |  | NA19038 | AFR | female |
| HG01047 | AMR | male |  | HG03027 | AFR | male |  | NA19041 | AFR | male |
| HG01048 | AMR | male |  | HG03028 | AFR | female |  | NA19042 | AFR | female |
| HG01049 | AMR | female |  | HG03039 | AFR | male |  | NA19043 | AFR | male |
| HG01051 | AMR | male |  | HG03040 | AFR | female |  | NA19054 | EAS | female |
| HG01052 | AMR | female |  | HG03045 | AFR | male |  | NA19055 | EAS | male |
| HG01054 | AMR | male |  | HG03046 | AFR | female |  | NA19056 | EAS | male |
| HG01055 | AMR | female |  | HG03048 | AFR | male |  | NA19057 | EAS | female |
| HG01058 | AMR | female |  | HG03049 | AFR | female |  | NA19058 | EAS | male |
| HG01060 | AMR | male |  | HG03052 | AFR | female |  | NA19059 | EAS | female |
| HG01061 | AMR | female |  | HG03054 | AFR | male |  | NA19060 | EAS | male |
| HG01063 | AMR | male |  | HG03055 | AFR | female |  | NA19062 | EAS | male |
| HG01064 | AMR | female |  | HG03057 | AFR | male |  | NA19063 | EAS | male |
| HG01066 | AMR | male |  | HG03058 | AFR | female |  | NA19064 | EAS | female |
| HG01067 | AMR | female |  | HG03060 | AFR | male |  | NA19065 | EAS | female |
| HG01069 | AMR | male |  | HG03061 | AFR | female |  | NA19066 | EAS | male |
| HG01070 | AMR | female |  | HG03063 | AFR | male |  | NA19067 | EAS | male |
| HG01072 | AMR | male |  | HG03064 | AFR | female |  | NA19068 | EAS | male |
| HG01073 | AMR | female |  | HG03066 | AFR | male |  | NA19070 | EAS | male |
| HG01075 | AMR | male |  | HG03069 | AFR | male |  | NA19072 | EAS | male |
| HG01077 | AMR | female |  | HG03072 | AFR | male |  | NA19074 | EAS | female |
| HG01079 | AMR | male |  | HG03073 | AFR | female |  | NA19075 | EAS | male |
| HG01080 | AMR | female |  | HG03074 | AFR | male |  | NA19076 | EAS | male |
| HG01082 | AMR | male |  | HG03077 | AFR | male |  | NA19077 | EAS | female |
| HG01083 | AMR | female |  | HG03078 | AFR | male |  | NA19078 | EAS | female |
| HG01085 | AMR | male |  | HG03079 | AFR | female |  | NA19079 | EAS | male |
| HG01086 | AMR | female |  | HG03081 | AFR | male |  | NA19080 | EAS | female |
| HG01088 | AMR | male |  | HG03082 | AFR | female |  | NA19081 | EAS | female |
| HG01089 | AMR | female |  | HG03084 | AFR | male |  | NA19082 | EAS | male |
| HG01092 | AMR | female |  | HG03085 | AFR | female |  | NA19083 | EAS | male |
| HG01094 | AMR | male |  | HG03086 | AFR | female |  | NA19084 | EAS | female |
| HG01095 | AMR | female |  | HG03088 | AFR | female |  | NA19085 | EAS | male |
| HG01097 | AMR | male |  | HG03091 | AFR | female |  | NA19086 | EAS | male |
| HG01098 | AMR | female |  | HG03095 | AFR | female |  | NA19087 | EAS | female |
| HG01101 | AMR | male |  | HG03096 | AFR | male |  | NA19088 | EAS | male |
| HG01102 | AMR | female |  | HG03097 | AFR | female |  | NA19089 | EAS | male |
| HG01104 | AMR | male |  | HG03099 | AFR | female |  | NA19090 | EAS | female |
| HG01105 | AMR | female |  | HG03100 | AFR | male |  | NA19091 | EAS | male |
| HG01107 | AMR | male |  | HG03103 | AFR | male |  | NA19092 | AFR | male |
| HG01108 | AMR | female |  | HG03105 | AFR | female |  | NA19093 | AFR | female |
| HG01110 | AMR | male |  | HG03108 | AFR | female |  | NA19095 | AFR | female |
| HG01111 | AMR | female |  | HG03109 | AFR | male |  | NA19096 | AFR | male |
| HG01112 | AMR | male |  | HG03111 | AFR | female |  | NA19098 | AFR | male |
| HG01113 | AMR | female |  | HG03112 | AFR | male |  | NA19099 | AFR | female |
| HG01119 | AMR | female |  | HG03114 | AFR | female |  | NA19102 | AFR | female |
| HG01121 | AMR | male |  | HG03115 | AFR | male |  | NA19107 | AFR | male |
| HG01122 | AMR | female |  | HG03117 | AFR | female |  | NA19108 | AFR | female |
| HG01124 | AMR | male |  | HG03118 | AFR | male |  | NA19113 | AFR | male |
| HG01125 | AMR | female |  | HG03120 | AFR | male |  | NA19114 | AFR | female |
| HG01130 | AMR | male |  | HG03121 | AFR | female |  | NA19116 | AFR | female |
| HG01131 | AMR | female |  | HG03123 | AFR | female |  | NA19117 | AFR | male |
| HG01133 | AMR | male |  | HG03124 | AFR | male |  | NA19118 | AFR | female |
| HG01134 | AMR | female |  | HG03126 | AFR | female |  | NA19119 | AFR | male |
| HG01136 | AMR | male |  | HG03127 | AFR | male |  | NA19121 | AFR | male |
| HG01137 | AMR | female |  | HG03129 | AFR | female |  | NA19129 | AFR | female |
| HG01139 | AMR | male |  | HG03130 | AFR | male |  | NA19130 | AFR | male |
| HG01140 | AMR | female |  | HG03132 | AFR | female |  | NA19131 | AFR | female |
| HG01142 | AMR | male |  | HG03133 | AFR | male |  | NA19137 | AFR | female |
| HG01148 | AMR | male |  | HG03135 | AFR | female |  | NA19138 | AFR | male |
| HG01149 | AMR | female |  | HG03136 | AFR | male |  | NA19141 | AFR | male |
| HG01161 | AMR | male |  | HG03139 | AFR | male |  | NA19143 | AFR | female |
| HG01162 | AMR | female |  | HG03157 | AFR | male |  | NA19144 | AFR | male |
| HG01164 | AMR | male |  | HG03159 | AFR | female |  | NA19146 | AFR | male |
| HG01167 | AMR | male |  | HG03160 | AFR | male |  | NA19147 | AFR | female |
| HG01168 | AMR | female |  | HG03162 | AFR | female |  | NA19149 | AFR | female |
| HG01170 | AMR | male |  | HG03163 | AFR | male |  | NA19152 | AFR | female |
| HG01171 | AMR | female |  | HG03166 | AFR | male |  | NA19153 | AFR | male |
| HG01173 | AMR | male |  | HG03168 | AFR | female |  | NA19159 | AFR | female |
| HG01174 | AMR | female |  | HG03169 | AFR | male |  | NA19160 | AFR | male |
| HG01176 | AMR | male |  | HG03172 | AFR | male |  | NA19171 | AFR | male |
| HG01177 | AMR | female |  | HG03175 | AFR | male |  | NA19172 | AFR | female |
| HG01182 | AMR | male |  | HG03189 | AFR | female |  | NA19175 | AFR | male |
| HG01183 | AMR | female |  | HG03190 | AFR | male |  | NA19184 | AFR | male |
| HG01187 | AMR | male |  | HG03193 | AFR | male |  | NA19185 | AFR | female |
| HG01188 | AMR | female |  | HG03195 | AFR | female |  | NA19189 | AFR | male |
| HG01190 | AMR | male |  | HG03196 | AFR | male |  | NA19190 | AFR | female |
| HG01191 | AMR | female |  | HG03198 | AFR | female |  | NA19197 | AFR | female |
| HG01197 | AMR | male |  | HG03199 | AFR | male |  | NA19198 | AFR | male |
| HG01198 | AMR | female |  | HG03202 | AFR | male |  | NA19200 | AFR | male |
| HG01200 | AMR | male |  | HG03209 | AFR | male |  | NA19201 | AFR | female |
| HG01204 | AMR | male |  | HG03212 | AFR | female |  | NA19204 | AFR | female |
| HG01205 | AMR | female |  | HG03224 | AFR | male |  | NA19206 | AFR | female |
| HG01241 | AMR | male |  | HG03225 | AFR | male |  | NA19207 | AFR | male |
| HG01242 | AMR | female |  | HG03228 | SAS | male |  | NA19209 | AFR | female |
| HG01247 | AMR | male |  | HG03229 | SAS | female |  | NA19210 | AFR | male |
| HG01248 | AMR | female |  | HG03234 | SAS | male |  | NA19213 | AFR | male |
| HG01250 | AMR | male |  | HG03235 | SAS | female |  | NA19214 | AFR | female |
| HG01251 | AMR | female |  | HG03237 | SAS | male |  | NA19222 | AFR | female |
| HG01253 | AMR | male |  | HG03238 | SAS | female |  | NA19223 | AFR | male |
| HG01254 | AMR | female |  | HG03240 | AFR | male |  | NA19225 | AFR | female |
| HG01256 | AMR | male |  | HG03241 | AFR | female |  | NA19235 | AFR | female |
| HG01257 | AMR | female |  | HG03246 | AFR | male |  | NA19236 | AFR | male |
| HG01259 | AMR | male |  | HG03247 | AFR | female |  | NA19238 | AFR | female |
| HG01260 | AMR | female |  | HG03258 | AFR | male |  | NA19239 | AFR | male |
| HG01269 | AMR | female |  | HG03259 | AFR | female |  | NA19247 | AFR | female |
| HG01271 | AMR | male |  | HG03265 | AFR | male |  | NA19248 | AFR | male |
| HG01272 | AMR | female |  | HG03267 | AFR | female |  | NA19256 | AFR | male |
| HG01275 | AMR | female |  | HG03268 | AFR | male |  | NA19257 | AFR | female |
| HG01277 | AMR | male |  | HG03270 | AFR | female |  | NA19307 | AFR | male |
| HG01280 | AMR | male |  | HG03271 | AFR | male |  | NA19308 | AFR | male |
| HG01281 | AMR | female |  | HG03279 | AFR | female |  | NA19309 | AFR | male |
| HG01284 | AMR | female |  | HG03280 | AFR | male |  | NA19310 | AFR | female |
| HG01286 | AMR | male |  | HG03291 | AFR | female |  | NA19312 | AFR | male |
| HG01302 | AMR | male |  | HG03294 | AFR | female |  | NA19314 | AFR | female |
| HG01303 | AMR | female |  | HG03295 | AFR | male |  | NA19315 | AFR | female |
| HG01305 | AMR | male |  | HG03297 | AFR | female |  | NA19316 | AFR | female |
| HG01308 | AMR | male |  | HG03298 | AFR | male |  | NA19317 | AFR | male |
| HG01311 | AMR | male |  | HG03300 | AFR | female |  | NA19318 | AFR | male |
| HG01312 | AMR | female |  | HG03301 | AFR | male |  | NA19319 | AFR | male |
| HG01323 | AMR | female |  | HG03303 | AFR | female |  | NA19320 | AFR | female |
| HG01325 | AMR | male |  | HG03304 | AFR | male |  | NA19321 | AFR | female |
| HG01326 | AMR | female |  | HG03311 | AFR | male |  | NA19323 | AFR | female |
| HG01334 | EUR | male |  | HG03313 | AFR | male |  | NA19324 | AFR | female |
| HG01341 | AMR | male |  | HG03342 | AFR | female |  | NA19327 | AFR | female |
| HG01342 | AMR | female |  | HG03343 | AFR | male |  | NA19328 | AFR | female |
| HG01344 | AMR | male |  | HG03351 | AFR | female |  | NA19331 | AFR | male |
| HG01345 | AMR | female |  | HG03352 | AFR | male |  | NA19332 | AFR | female |
| HG01348 | AMR | female |  | HG03354 | AFR | female |  | NA19334 | AFR | male |
| HG01350 | AMR | male |  | HG03363 | AFR | female |  | NA19338 | AFR | female |
| HG01351 | AMR | female |  | HG03366 | AFR | female |  | NA19346 | AFR | male |
| HG01353 | AMR | male |  | HG03367 | AFR | male |  | NA19347 | AFR | male |
| HG01354 | AMR | female |  | HG03369 | AFR | female |  | NA19350 | AFR | male |
| HG01356 | AMR | male |  | HG03370 | AFR | male |  | NA19351 | AFR | female |
| HG01357 | AMR | female |  | HG03372 | AFR | female |  | NA19355 | AFR | female |
| HG01359 | AMR | male |  | HG03376 | AFR | male |  | NA19360 | AFR | male |
| HG01360 | AMR | female |  | HG03378 | AFR | female |  | NA19372 | AFR | male |
| HG01362 | AMR | male |  | HG03380 | AFR | female |  | NA19374 | AFR | male |
| HG01363 | AMR | female |  | HG03382 | AFR | male |  | NA19375 | AFR | male |
| HG01365 | AMR | male |  | HG03385 | AFR | male |  | NA19376 | AFR | male |
| HG01366 | AMR | female |  | HG03388 | AFR | male |  | NA19377 | AFR | female |
| HG01369 | AMR | female |  | HG03391 | AFR | male |  | NA19378 | AFR | female |
| HG01372 | AMR | female |  | HG03394 | AFR | male |  | NA19379 | AFR | female |
| HG01374 | AMR | male |  | HG03397 | AFR | male |  | NA19380 | AFR | male |
| HG01375 | AMR | female |  | HG03401 | AFR | female |  | NA19383 | AFR | male |
| HG01377 | AMR | male |  | HG03410 | AFR | female |  | NA19384 | AFR | male |
| HG01378 | AMR | female |  | HG03419 | AFR | female |  | NA19385 | AFR | male |
| HG01383 | AMR | male |  | HG03428 | AFR | female |  | NA19390 | AFR | female |
| HG01384 | AMR | female |  | HG03432 | AFR | male |  | NA19391 | AFR | female |
| HG01389 | AMR | male |  | HG03433 | AFR | male |  | NA19393 | AFR | male |
| HG01390 | AMR | female |  | HG03436 | AFR | male |  | NA19394 | AFR | male |
| HG01392 | AMR | male |  | HG03437 | AFR | female |  | NA19395 | AFR | female |
| HG01393 | AMR | female |  | HG03439 | AFR | male |  | NA19397 | AFR | male |
| HG01395 | AMR | male |  | HG03442 | AFR | male |  | NA19399 | AFR | female |
| HG01396 | AMR | female |  | HG03445 | AFR | male |  | NA19401 | AFR | female |
| HG01398 | AMR | male |  | HG03446 | AFR | female |  | NA19403 | AFR | female |
| HG01402 | AMR | male |  | HG03449 | AFR | female |  | NA19404 | AFR | female |
| HG01403 | AMR | female |  | HG03451 | AFR | male |  | NA19428 | AFR | male |
| HG01405 | AMR | male |  | HG03452 | AFR | female |  | NA19429 | AFR | male |
| HG01412 | AMR | male |  | HG03455 | AFR | female |  | NA19430 | AFR | male |
| HG01413 | AMR | male |  | HG03457 | AFR | male |  | NA19431 | AFR | female |
| HG01414 | AMR | female |  | HG03458 | AFR | female |  | NA19434 | AFR | female |
| HG01431 | AMR | male |  | HG03460 | AFR | male |  | NA19435 | AFR | female |
| HG01432 | AMR | female |  | HG03461 | AFR | female |  | NA19436 | AFR | female |
| HG01435 | AMR | female |  | HG03464 | AFR | female |  | NA19437 | AFR | female |
| HG01437 | AMR | male |  | HG03469 | AFR | male |  | NA19438 | AFR | female |
| HG01438 | AMR | female |  | HG03470 | AFR | female |  | NA19439 | AFR | female |
| HG01440 | AMR | male |  | HG03472 | AFR | male |  | NA19440 | AFR | female |
| HG01441 | AMR | female |  | HG03473 | AFR | female |  | NA19443 | AFR | male |
| HG01443 | AMR | male |  | HG03476 | AFR | female |  | NA19445 | AFR | female |
| HG01444 | AMR | female |  | HG03478 | AFR | male |  | NA19446 | AFR | female |
| HG01447 | AMR | female |  | HG03479 | AFR | female |  | NA19448 | AFR | male |
| HG01455 | AMR | male |  | HG03484 | AFR | male |  | NA19449 | AFR | female |
| HG01456 | AMR | female |  | HG03485 | AFR | female |  | NA19451 | AFR | male |
| HG01459 | AMR | female |  | HG03488 | SAS | female |  | NA19452 | AFR | male |
| HG01461 | AMR | male |  | HG03490 | SAS | male |  | NA19454 | AFR | male |
| HG01462 | AMR | female |  | HG03491 | SAS | female |  | NA19455 | AFR | male |
| HG01464 | AMR | male |  | HG03499 | AFR | female |  | NA19456 | AFR | female |
| HG01465 | AMR | female |  | HG03511 | AFR | female |  | NA19457 | AFR | female |
| HG01468 | AMR | female |  | HG03514 | AFR | female |  | NA19461 | AFR | male |
| HG01474 | AMR | female |  | HG03515 | AFR | male |  | NA19462 | AFR | female |
| HG01479 | AMR | male |  | HG03517 | AFR | female |  | NA19463 | AFR | female |
| HG01485 | AMR | male |  | HG03518 | AFR | male |  | NA19466 | AFR | male |
| HG01486 | AMR | female |  | HG03520 | AFR | female |  | NA19467 | AFR | female |
| HG01488 | AMR | male |  | HG03521 | AFR | male |  | NA19468 | AFR | female |
| HG01489 | AMR | female |  | HG03538 | AFR | male |  | NA19471 | AFR | female |
| HG01491 | AMR | male |  | HG03539 | AFR | female |  | NA19472 | AFR | female |
| HG01492 | AMR | female |  | HG03547 | AFR | male |  | NA19473 | AFR | female |
| HG01494 | AMR | male |  | HG03548 | AFR | female |  | NA19474 | AFR | female |
| HG01495 | AMR | female |  | HG03556 | AFR | male |  | NA19475 | AFR | female |
| HG01497 | AMR | male |  | HG03557 | AFR | female |  | NA19625 | AFR | female |
| HG01498 | AMR | female |  | HG03558 | AFR | female |  | NA19648 | AMR | female |
| HG01500 | EUR | male |  | HG03559 | AFR | male |  | NA19649 | AMR | male |
| HG01501 | EUR | female |  | HG03563 | AFR | female |  | NA19651 | AMR | female |
| HG01503 | EUR | male |  | HG03565 | AFR | male |  | NA19652 | AMR | male |
| HG01504 | EUR | female |  | HG03567 | AFR | female |  | NA19654 | AMR | female |
| HG01506 | EUR | male |  | HG03571 | AFR | male |  | NA19655 | AMR | male |
| HG01507 | EUR | female |  | HG03572 | AFR | female |  | NA19657 | AMR | female |
| HG01509 | EUR | male |  | HG03575 | AFR | female |  | NA19658 | AMR | male |
| HG01510 | EUR | female |  | HG03577 | AFR | male |  | NA19661 | AMR | male |
| HG01512 | EUR | male |  | HG03578 | AFR | female |  | NA19663 | AMR | female |
| HG01513 | EUR | female |  | HG03583 | AFR | female |  | NA19664 | AMR | male |
| HG01515 | EUR | male |  | HG03585 | SAS | male |  | NA19669 | AMR | female |
| HG01516 | EUR | female |  | HG03589 | SAS | female |  | NA19670 | AMR | male |
| HG01518 | EUR | male |  | HG03593 | SAS | male |  | NA19676 | AMR | male |
| HG01519 | EUR | female |  | HG03594 | SAS | male |  | NA19678 | AMR | female |
| HG01521 | EUR | male |  | HG03595 | SAS | female |  | NA19679 | AMR | male |
| HG01522 | EUR | female |  | HG03598 | SAS | female |  | NA19681 | AMR | female |
| HG01524 | EUR | male |  | HG03600 | SAS | male |  | NA19682 | AMR | male |
| HG01525 | EUR | female |  | HG03603 | SAS | male |  | NA19684 | AMR | female |
| HG01527 | EUR | male |  | HG03604 | SAS | female |  | NA19700 | AFR | male |
| HG01528 | EUR | female |  | HG03607 | SAS | female |  | NA19701 | AFR | female |
| HG01530 | EUR | male |  | HG03611 | SAS | female |  | NA19703 | AFR | male |
| HG01531 | EUR | female |  | HG03615 | SAS | male |  | NA19704 | AFR | female |
| HG01536 | EUR | male |  | HG03616 | SAS | female |  | NA19707 | AFR | female |
| HG01537 | EUR | female |  | HG03619 | SAS | female |  | NA19711 | AFR | male |
| HG01550 | AMR | male |  | HG03624 | SAS | male |  | NA19712 | AFR | female |
| HG01551 | AMR | female |  | HG03625 | SAS | female |  | NA19713 | AFR | female |
| HG01556 | AMR | male |  | HG03629 | SAS | male |  | NA19716 | AMR | female |
| HG01565 | AMR | male |  | HG03631 | SAS | female |  | NA19717 | AMR | male |
| HG01566 | AMR | female |  | HG03634 | SAS | female |  | NA19719 | AMR | female |
| HG01571 | AMR | male |  | HG03636 | SAS | male |  | NA19720 | AMR | male |
| HG01572 | AMR | female |  | HG03640 | SAS | female |  | NA19722 | AMR | female |
| HG01577 | AMR | male |  | HG03642 | SAS | female |  | NA19723 | AMR | male |
| HG01578 | AMR | female |  | HG03643 | SAS | female |  | NA19725 | AMR | female |
| HG01583 | SAS | male |  | HG03644 | SAS | male |  | NA19726 | AMR | male |
| HG01586 | SAS | male |  | HG03645 | SAS | female |  | NA19728 | AMR | female |
| HG01589 | SAS | male |  | HG03646 | SAS | male |  | NA19729 | AMR | male |
| HG01593 | SAS | female |  | HG03649 | SAS | male |  | NA19731 | AMR | female |
| HG01595 | EAS | female |  | HG03652 | SAS | male |  | NA19732 | AMR | male |
| HG01596 | EAS | male |  | HG03653 | SAS | female |  | NA19734 | AMR | female |
| HG01597 | EAS | female |  | HG03660 | SAS | male |  | NA19735 | AMR | male |
| HG01598 | EAS | female |  | HG03663 | SAS | male |  | NA19740 | AMR | female |
| HG01599 | EAS | female |  | HG03667 | SAS | male |  | NA19741 | AMR | male |
| HG01600 | EAS | female |  | HG03668 | SAS | female |  | NA19746 | AMR | female |
| HG01602 | EUR | female |  | HG03672 | SAS | male |  | NA19747 | AMR | male |
| HG01603 | EUR | male |  | HG03673 | SAS | female |  | NA19749 | AMR | female |
| HG01605 | EUR | female |  | HG03679 | SAS | male |  | NA19750 | AMR | male |
| HG01606 | EUR | male |  | HG03680 | SAS | male |  | NA19752 | AMR | female |
| HG01607 | EUR | female |  | HG03681 | SAS | male |  | NA19755 | AMR | female |
| HG01608 | EUR | male |  | HG03684 | SAS | female |  | NA19756 | AMR | male |
| HG01610 | EUR | male |  | HG03685 | SAS | male |  | NA19758 | AMR | female |
| HG01612 | EUR | female |  | HG03686 | SAS | male |  | NA19759 | AMR | male |
| HG01613 | EUR | female |  | HG03687 | SAS | male |  | NA19761 | AMR | female |
| HG01615 | EUR | male |  | HG03689 | SAS | female |  | NA19762 | AMR | male |
| HG01617 | EUR | male |  | HG03690 | SAS | female |  | NA19764 | AMR | female |
| HG01618 | EUR | female |  | HG03691 | SAS | male |  | NA19770 | AMR | female |
| HG01619 | EUR | male |  | HG03692 | SAS | female |  | NA19771 | AMR | male |
| HG01620 | EUR | female |  | HG03693 | SAS | male |  | NA19773 | AMR | female |
| HG01623 | EUR | female |  | HG03694 | SAS | male |  | NA19774 | AMR | male |
| HG01624 | EUR | male |  | HG03695 | SAS | male |  | NA19776 | AMR | female |
| HG01625 | EUR | male |  | HG03696 | SAS | male |  | NA19777 | AMR | male |
| HG01626 | EUR | female |  | HG03697 | SAS | male |  | NA19779 | AMR | female |
| HG01628 | EUR | female |  | HG03698 | SAS | female |  | NA19780 | AMR | male |
| HG01630 | EUR | male |  | HG03702 | SAS | male |  | NA19782 | AMR | female |
| HG01631 | EUR | male |  | HG03703 | SAS | female |  | NA19783 | AMR | male |
| HG01632 | EUR | female |  | HG03705 | SAS | male |  | NA19785 | AMR | female |
| HG01668 | EUR | female |  | HG03706 | SAS | female |  | NA19786 | AMR | male |
| HG01669 | EUR | male |  | HG03708 | SAS | male |  | NA19788 | AMR | female |
| HG01670 | EUR | female |  | HG03709 | SAS | female |  | NA19789 | AMR | male |
| HG01672 | EUR | male |  | HG03711 | SAS | male |  | NA19792 | AMR | male |
| HG01673 | EUR | female |  | HG03713 | SAS | male |  | NA19794 | AMR | female |
| HG01675 | EUR | male |  | HG03714 | SAS | female |  | NA19795 | AMR | male |
| HG01676 | EUR | female |  | HG03716 | SAS | male |  | NA19818 | AFR | male |
| HG01678 | EUR | male |  | HG03717 | SAS | female |  | NA19819 | AFR | female |
| HG01679 | EUR | female |  | HG03718 | SAS | male |  | NA19834 | AFR | male |
| HG01680 | EUR | male |  | HG03720 | SAS | male |  | NA19835 | AFR | female |
| HG01682 | EUR | male |  | HG03722 | SAS | female |  | NA19900 | AFR | male |
| HG01684 | EUR | female |  | HG03727 | SAS | male |  | NA19901 | AFR | female |
| HG01685 | EUR | female |  | HG03729 | SAS | male |  | NA19904 | AFR | male |
| HG01686 | EUR | male |  | HG03730 | SAS | female |  | NA19908 | AFR | male |
| HG01694 | EUR | male |  | HG03731 | SAS | female |  | NA19909 | AFR | female |
| HG01695 | EUR | female |  | HG03733 | SAS | female |  | NA19913 | AFR | female |
| HG01697 | EUR | female |  | HG03736 | SAS | female |  | NA19914 | AFR | female |
| HG01699 | EUR | male |  | HG03738 | SAS | male |  | NA19916 | AFR | male |
| HG01700 | EUR | male |  | HG03740 | SAS | male |  | NA19917 | AFR | female |
| HG01702 | EUR | female |  | HG03741 | SAS | female |  | NA19920 | AFR | male |
| HG01704 | EUR | female |  | HG03742 | SAS | male |  | NA19921 | AFR | female |
| HG01705 | EUR | male |  | HG03743 | SAS | male |  | NA19922 | AFR | male |
| HG01707 | EUR | female |  | HG03744 | SAS | male |  | NA19923 | AFR | female |
| HG01708 | EUR | male |  | HG03745 | SAS | male |  | NA19982 | AFR | male |
| HG01709 | EUR | male |  | HG03746 | SAS | male |  | NA19984 | AFR | male |
| HG01710 | EUR | female |  | HG03750 | SAS | male |  | NA20126 | AFR | male |
| HG01746 | EUR | female |  | HG03752 | SAS | female |  | NA20127 | AFR | female |
| HG01747 | EUR | male |  | HG03753 | SAS | male |  | NA20274 | AFR | female |
| HG01756 | EUR | male |  | HG03754 | SAS | female |  | NA20276 | AFR | female |
| HG01757 | EUR | female |  | HG03755 | SAS | male |  | NA20278 | AFR | male |
| HG01761 | EUR | male |  | HG03756 | SAS | female |  | NA20281 | AFR | male |
| HG01762 | EUR | female |  | HG03757 | SAS | female |  | NA20282 | AFR | female |
| HG01765 | EUR | male |  | HG03760 | SAS | female |  | NA20287 | AFR | female |
| HG01766 | EUR | female |  | HG03762 | SAS | female |  | NA20289 | AFR | female |
| HG01767 | EUR | male |  | HG03765 | SAS | female |  | NA20291 | AFR | male |
| HG01768 | EUR | female |  | HG03767 | SAS | male |  | NA20294 | AFR | female |
| HG01770 | EUR | female |  | HG03770 | SAS | female |  | NA20296 | AFR | female |
| HG01771 | EUR | male |  | HG03771 | SAS | male |  | NA20298 | AFR | male |
| HG01773 | EUR | female |  | HG03772 | SAS | female |  | NA20299 | AFR | female |
| HG01775 | EUR | male |  | HG03773 | SAS | male |  | NA20314 | AFR | female |
| HG01776 | EUR | female |  | HG03774 | SAS | female |  | NA20317 | AFR | female |
| HG01777 | EUR | male |  | HG03775 | SAS | male |  | NA20318 | AFR | male |
| HG01779 | EUR | female |  | HG03777 | SAS | male |  | NA20320 | AFR | female |
| HG01781 | EUR | male |  | HG03778 | SAS | male |  | NA20321 | AFR | female |
| HG01783 | EUR | male |  | HG03779 | SAS | male |  | NA20332 | AFR | female |
| HG01784 | EUR | female |  | HG03780 | SAS | female |  | NA20334 | AFR | female |
| HG01785 | EUR | male |  | HG03781 | SAS | female |  | NA20339 | AFR | female |
| HG01786 | EUR | female |  | HG03782 | SAS | female |  | NA20340 | AFR | male |
| HG01789 | EUR | male |  | HG03784 | SAS | female |  | NA20342 | AFR | male |
| HG01790 | EUR | female |  | HG03785 | SAS | male |  | NA20346 | AFR | male |
| HG01791 | EUR | male |  | HG03786 | SAS | male |  | NA20348 | AFR | male |
| HG01794 | EAS | female |  | HG03787 | SAS | female |  | NA20351 | AFR | male |
| HG01795 | EAS | female |  | HG03788 | SAS | male |  | NA20355 | AFR | female |
| HG01796 | EAS | female |  | HG03789 | SAS | female |  | NA20356 | AFR | male |
| HG01797 | EAS | female |  | HG03790 | SAS | male |  | NA20357 | AFR | female |
| HG01798 | EAS | female |  | HG03792 | SAS | male |  | NA20359 | AFR | female |
| HG01799 | EAS | female |  | HG03793 | SAS | female |  | NA20362 | AFR | male |
| HG01800 | EAS | female |  | HG03796 | SAS | female |  | NA20412 | AFR | female |
| HG01801 | EAS | female |  | HG03800 | SAS | male |  | NA20502 | EUR | female |
| HG01802 | EAS | female |  | HG03802 | SAS | female |  | NA20503 | EUR | female |
| HG01804 | EAS | female |  | HG03803 | SAS | male |  | NA20504 | EUR | female |
| HG01805 | EAS | female |  | HG03805 | SAS | female |  | NA20505 | EUR | female |
| HG01806 | EAS | female |  | HG03808 | SAS | female |  | NA20506 | EUR | female |
| HG01807 | EAS | female |  | HG03809 | SAS | male |  | NA20507 | EUR | female |
| HG01808 | EAS | female |  | HG03812 | SAS | male |  | NA20508 | EUR | female |
| HG01809 | EAS | female |  | HG03814 | SAS | female |  | NA20509 | EUR | male |
| HG01810 | EAS | male |  | HG03815 | SAS | male |  | NA20510 | EUR | male |
| HG01811 | EAS | male |  | HG03817 | SAS | female |  | NA20511 | EUR | male |
| HG01812 | EAS | female |  | HG03821 | SAS | male |  | NA20512 | EUR | male |
| HG01813 | EAS | female |  | HG03823 | SAS | female |  | NA20513 | EUR | male |
| HG01815 | EAS | female |  | HG03824 | SAS | male |  | NA20514 | EUR | female |
| HG01816 | EAS | male |  | HG03826 | SAS | female |  | NA20515 | EUR | male |
| HG01817 | EAS | female |  | HG03829 | SAS | female |  | NA20516 | EUR | male |
| HG01840 | EAS | male |  | HG03830 | SAS | male |  | NA20517 | EUR | female |
| HG01841 | EAS | female |  | HG03832 | SAS | female |  | NA20518 | EUR | male |
| HG01842 | EAS | male |  | HG03833 | SAS | male |  | NA20519 | EUR | male |
| HG01843 | EAS | female |  | HG03836 | SAS | female |  | NA20520 | EUR | male |
| HG01844 | EAS | male |  | HG03837 | SAS | male |  | NA20521 | EUR | male |
| HG01845 | EAS | female |  | HG03838 | SAS | female |  | NA20522 | EUR | female |
| HG01846 | EAS | male |  | HG03844 | SAS | male |  | NA20524 | EUR | male |
| HG01847 | EAS | female |  | HG03846 | SAS | male |  | NA20525 | EUR | male |
| HG01848 | EAS | female |  | HG03848 | SAS | male |  | NA20527 | EUR | male |
| HG01849 | EAS | male |  | HG03849 | SAS | female |  | NA20528 | EUR | male |
| HG01850 | EAS | female |  | HG03850 | SAS | male |  | NA20529 | EUR | female |
| HG01851 | EAS | female |  | HG03851 | SAS | male |  | NA20530 | EUR | female |
| HG01852 | EAS | male |  | HG03854 | SAS | male |  | NA20531 | EUR | female |
| HG01853 | EAS | female |  | HG03856 | SAS | male |  | NA20532 | EUR | male |
| HG01855 | EAS | female |  | HG03857 | SAS | female |  | NA20533 | EUR | female |
| HG01857 | EAS | female |  | HG03858 | SAS | female |  | NA20534 | EUR | male |
| HG01858 | EAS | female |  | HG03861 | SAS | female |  | NA20535 | EUR | female |
| HG01859 | EAS | female |  | HG03862 | SAS | female |  | NA20536 | EUR | male |
| HG01860 | EAS | male |  | HG03863 | SAS | female |  | NA20538 | EUR | male |
| HG01861 | EAS | male |  | HG03864 | SAS | male |  | NA20539 | EUR | male |
| HG01862 | EAS | female |  | HG03866 | SAS | male |  | NA20540 | EUR | female |
| HG01863 | EAS | female |  | HG03867 | SAS | male |  | NA20541 | EUR | female |
| HG01864 | EAS | male |  | HG03868 | SAS | female |  | NA20542 | EUR | female |
| HG01865 | EAS | male |  | HG03869 | SAS | male |  | NA20543 | EUR | male |
| HG01866 | EAS | male |  | HG03870 | SAS | male |  | NA20544 | EUR | male |
| HG01867 | EAS | male |  | HG03871 | SAS | male |  | NA20581 | EUR | male |
| HG01868 | EAS | female |  | HG03872 | SAS | male |  | NA20582 | EUR | female |
| HG01869 | EAS | female |  | HG03873 | SAS | female |  | NA20585 | EUR | female |
| HG01870 | EAS | female |  | HG03874 | SAS | female |  | NA20586 | EUR | male |
| HG01871 | EAS | female |  | HG03875 | SAS | male |  | NA20587 | EUR | female |
| HG01872 | EAS | male |  | HG03882 | SAS | female |  | NA20588 | EUR | male |
| HG01873 | EAS | male |  | HG03884 | SAS | female |  | NA20589 | EUR | female |
| HG01874 | EAS | female |  | HG03885 | SAS | male |  | NA20752 | EUR | male |
| HG01878 | EAS | female |  | HG03886 | SAS | female |  | NA20753 | EUR | female |
| HG01879 | AFR | male |  | HG03887 | SAS | male |  | NA20754 | EUR | male |
| HG01880 | AFR | female |  | HG03888 | SAS | female |  | NA20755 | EUR | male |
| HG01882 | AFR | male |  | HG03890 | SAS | male |  | NA20756 | EUR | female |
| HG01883 | AFR | female |  | HG03894 | SAS | female |  | NA20757 | EUR | female |
| HG01885 | AFR | male |  | HG03895 | SAS | female |  | NA20758 | EUR | male |
| HG01886 | AFR | female |  | HG03896 | SAS | male |  | NA20759 | EUR | male |
| HG01889 | AFR | female |  | HG03897 | SAS | female |  | NA20760 | EUR | female |
| HG01890 | AFR | male |  | HG03898 | SAS | female |  | NA20761 | EUR | female |
| HG01892 | AMR | male |  | HG03899 | SAS | male |  | NA20762 | EUR | male |
| HG01893 | AMR | female |  | HG03900 | SAS | male |  | NA20763 | EUR | male |
| HG01894 | AFR | female |  | HG03902 | SAS | male |  | NA20764 | EUR | female |
| HG01896 | AFR | female |  | HG03905 | SAS | male |  | NA20765 | EUR | male |
| HG01912 | AFR | male |  | HG03907 | SAS | female |  | NA20766 | EUR | female |
| HG01914 | AFR | male |  | HG03908 | SAS | male |  | NA20767 | EUR | male |
| HG01915 | AFR | female |  | HG03910 | SAS | female |  | NA20768 | EUR | female |
| HG01917 | AMR | male |  | HG03911 | SAS | male |  | NA20769 | EUR | female |
| HG01918 | AMR | female |  | HG03913 | SAS | female |  | NA20770 | EUR | male |
| HG01920 | AMR | male |  | HG03914 | SAS | male |  | NA20771 | EUR | female |
| HG01921 | AMR | female |  | HG03916 | SAS | female |  | NA20772 | EUR | female |
| HG01923 | AMR | male |  | HG03917 | SAS | male |  | NA20773 | EUR | female |
| HG01924 | AMR | female |  | HG03919 | SAS | female |  | NA20774 | EUR | female |
| HG01926 | AMR | male |  | HG03920 | SAS | male |  | NA20775 | EUR | female |
| HG01927 | AMR | female |  | HG03922 | SAS | female |  | NA20778 | EUR | male |
| HG01932 | AMR | male |  | HG03925 | SAS | female |  | NA20783 | EUR | male |
| HG01933 | AMR | female |  | HG03926 | SAS | male |  | NA20785 | EUR | male |
| HG01935 | AMR | male |  | HG03928 | SAS | female |  | NA20786 | EUR | female |
| HG01936 | AMR | female |  | HG03931 | SAS | female |  | NA20787 | EUR | male |
| HG01938 | AMR | male |  | HG03934 | SAS | female |  | NA20790 | EUR | female |
| HG01939 | AMR | female |  | HG03937 | SAS | female |  | NA20792 | EUR | male |
| HG01941 | AMR | male |  | HG03940 | SAS | female |  | NA20795 | EUR | female |
| HG01942 | AMR | female |  | HG03941 | SAS | male |  | NA20796 | EUR | male |
| HG01944 | AMR | male |  | HG03943 | SAS | male |  | NA20797 | EUR | female |
| HG01945 | AMR | female |  | HG03944 | SAS | female |  | NA20798 | EUR | male |
| HG01947 | AMR | male |  | HG03945 | SAS | female |  | NA20799 | EUR | female |
| HG01948 | AMR | female |  | HG03947 | SAS | female |  | NA20800 | EUR | female |
| HG01950 | AMR | male |  | HG03949 | SAS | female |  | NA20801 | EUR | male |
| HG01951 | AMR | female |  | HG03950 | SAS | male |  | NA20802 | EUR | female |
| HG01953 | AMR | male |  | HG03951 | SAS | female |  | NA20803 | EUR | male |
| HG01954 | AMR | female |  | HG03953 | SAS | male |  | NA20804 | EUR | female |
| HG01956 | AFR | female |  | HG03955 | SAS | female |  | NA20805 | EUR | male |
| HG01958 | AFR | female |  | HG03960 | SAS | male |  | NA20806 | EUR | male |
| HG01961 | AMR | male |  | HG03963 | SAS | male |  | NA20807 | EUR | female |
| HG01965 | AMR | female |  | HG03965 | SAS | male |  | NA20808 | EUR | female |
| HG01967 | AMR | male |  | HG03967 | SAS | male |  | NA20809 | EUR | male |
| HG01968 | AMR | female |  | HG03968 | SAS | female |  | NA20810 | EUR | male |
| HG01970 | AMR | male |  | HG03969 | SAS | male |  | NA20811 | EUR | male |
| HG01971 | AMR | female |  | HG03971 | SAS | male |  | NA20812 | EUR | male |
| HG01973 | AMR | female |  | HG03973 | SAS | female |  | NA20813 | EUR | female |
| HG01974 | AMR | male |  | HG03974 | SAS | male |  | NA20814 | EUR | male |
| HG01976 | AMR | female |  | HG03976 | SAS | male |  | NA20815 | EUR | male |
| HG01977 | AMR | male |  | HG03977 | SAS | female |  | NA20818 | EUR | female |
| HG01979 | AMR | male |  | HG03978 | SAS | male |  | NA20819 | EUR | female |
| HG01980 | AMR | female |  | HG03985 | SAS | male |  | NA20821 | EUR | female |
| HG01982 | AMR | male |  | HG03986 | SAS | female |  | NA20822 | EUR | female |
| HG01985 | AFR | female |  | HG03989 | SAS | female |  | NA20826 | EUR | female |
| HG01986 | AFR | male |  | HG03990 | SAS | male |  | NA20827 | EUR | male |
| HG01988 | AFR | male |  | HG03991 | SAS | male |  | NA20828 | EUR | female |
| HG01989 | AFR | female |  | HG03995 | SAS | female |  | NA20832 | EUR | female |
| HG01990 | AFR | male |  | HG03998 | SAS | male |  | NA20845 | SAS | male |
| HG01991 | AMR | male |  | HG03999 | SAS | male |  | NA20846 | SAS | male |
| HG01992 | AMR | female |  | HG04001 | SAS | female |  | NA20847 | SAS | female |
| HG01997 | AMR | female |  | HG04002 | SAS | male |  | NA20849 | SAS | female |
| HG02002 | AMR | male |  | HG04003 | SAS | male |  | NA20850 | SAS | male |
| HG02003 | AMR | female |  | HG04006 | SAS | male |  | NA20851 | SAS | female |
| HG02006 | AMR | female |  | HG04014 | SAS | female |  | NA20852 | SAS | male |
| HG02008 | AMR | male |  | HG04015 | SAS | male |  | NA20853 | SAS | female |
| HG02009 | AFR | male |  | HG04017 | SAS | male |  | NA20854 | SAS | female |
| HG02010 | AFR | female |  | HG04018 | SAS | female |  | NA20856 | SAS | female |
| HG02012 | AFR | female |  | HG04019 | SAS | male |  | NA20858 | SAS | male |
| HG02013 | AFR | male |  | HG04020 | SAS | male |  | NA20859 | SAS | female |
| HG02014 | AFR | male |  | HG04022 | SAS | male |  | NA20861 | SAS | male |
| HG02016 | EAS | female |  | HG04023 | SAS | male |  | NA20862 | SAS | female |
| HG02017 | EAS | male |  | HG04025 | SAS | female |  | NA20863 | SAS | male |
| HG02019 | EAS | female |  | HG04026 | SAS | female |  | NA20864 | SAS | male |
| HG02020 | EAS | male |  | HG04029 | SAS | female |  | NA20866 | SAS | male |
| HG02023 | EAS | male |  | HG04033 | SAS | male |  | NA20867 | SAS | male |
| HG02025 | EAS | female |  | HG04035 | SAS | female |  | NA20868 | SAS | female |
| HG02026 | EAS | male |  | HG04038 | SAS | female |  | NA20869 | SAS | female |
| HG02028 | EAS | female |  | HG04039 | SAS | male |  | NA20870 | SAS | male |
| HG02029 | EAS | male |  | HG04042 | SAS | female |  | NA20872 | SAS | female |
| HG02031 | EAS | female |  | HG04047 | SAS | female |  | NA20874 | SAS | female |
| HG02032 | EAS | male |  | HG04054 | SAS | female |  | NA20875 | SAS | female |
| HG02035 | EAS | male |  | HG04056 | SAS | male |  | NA20876 | SAS | female |
| HG02040 | EAS | male |  | HG04059 | SAS | female |  | NA20877 | SAS | female |
| HG02047 | EAS | male |  | HG04060 | SAS | male |  | NA20878 | SAS | female |
| HG02048 | EAS | female |  | HG04061 | SAS | male |  | NA20881 | SAS | female |
| HG02049 | EAS | female |  | HG04062 | SAS | female |  | NA20882 | SAS | female |
| HG02050 | EAS | male |  | HG04063 | SAS | female |  | NA20884 | SAS | male |
| HG02051 | AFR | male |  | HG04070 | SAS | female |  | NA20885 | SAS | male |
| HG02052 | AFR | female |  | HG04075 | SAS | female |  | NA20886 | SAS | female |
| HG02053 | AFR | male |  | HG04076 | SAS | female |  | NA20887 | SAS | male |
| HG02054 | AFR | female |  | HG04080 | SAS | male |  | NA20888 | SAS | female |
| HG02057 | EAS | female |  | HG04090 | SAS | female |  | NA20889 | SAS | male |
| HG02058 | EAS | male |  | HG04093 | SAS | male |  | NA20890 | SAS | male |
| HG02060 | EAS | female |  | HG04094 | SAS | male |  | NA20891 | SAS | male |
| HG02061 | EAS | male |  | HG04096 | SAS | male |  | NA20892 | SAS | female |
| HG02064 | EAS | male |  | HG04098 | SAS | male |  | NA20894 | SAS | female |
| HG02067 | EAS | male |  | HG04099 | SAS | female |  | NA20895 | SAS | male |
| HG02069 | EAS | female |  | HG04100 | SAS | male |  | NA20896 | SAS | female |
| HG02070 | EAS | male |  | HG04106 | SAS | female |  | NA20897 | SAS | male |
| HG02072 | EAS | female |  | HG04107 | SAS | male |  | NA20899 | SAS | female |
| HG02073 | EAS | male |  | HG04118 | SAS | female |  | NA20900 | SAS | female |
| HG02075 | EAS | female |  | HG04131 | SAS | male |  | NA20901 | SAS | male |
| HG02076 | EAS | male |  | HG04134 | SAS | male |  | NA20902 | SAS | female |
| HG02078 | EAS | female |  | HG04140 | SAS | male |  | NA20903 | SAS | male |
| HG02079 | EAS | male |  | HG04141 | SAS | female |  | NA20904 | SAS | male |
| HG02081 | EAS | female |  | HG04144 | SAS | female |  | NA20905 | SAS | male |
| HG02082 | EAS | male |  | HG04146 | SAS | male |  | NA20906 | SAS | female |
| HG02084 | EAS | female |  | HG04152 | SAS | male |  | NA20908 | SAS | female |
| HG02085 | EAS | male |  | HG04153 | SAS | female |  | NA20910 | SAS | female |
| HG02086 | EAS | female |  | HG04155 | SAS | male |  | NA20911 | SAS | male |
| HG02087 | EAS | female |  | HG04156 | SAS | female |  | NA21086 | SAS | female |
| HG02088 | EAS | male |  | HG04158 | SAS | male |  | NA21087 | SAS | male |
| HG02089 | AMR | female |  | HG04159 | SAS | female |  | NA21088 | SAS | female |
| HG02090 | AMR | male |  | HG04161 | SAS | male |  | NA21089 | SAS | female |
| HG02095 | AFR | female |  | HG04162 | SAS | female |  | NA21090 | SAS | male |
| HG02102 | AMR | female |  | HG04164 | SAS | male |  | NA21091 | SAS | male |
| HG02104 | AMR | male |  | HG04171 | SAS | female |  | NA21092 | SAS | male |
| HG02105 | AMR | female |  | HG04173 | SAS | male |  | NA21093 | SAS | male |
| HG02107 | AFR | male |  | HG04176 | SAS | male |  | NA21094 | SAS | male |
| HG02108 | AFR | female |  | HG04177 | SAS | female |  | NA21095 | SAS | male |
| HG02111 | AFR | female |  | HG04180 | SAS | female |  | NA21097 | SAS | female |
| HG02113 | EAS | female |  | HG04182 | SAS | male |  | NA21098 | SAS | male |
| HG02116 | EAS | male |  | HG04183 | SAS | female |  | NA21099 | SAS | male |
| HG02121 | EAS | female |  | HG04185 | SAS | male |  | NA21100 | SAS | male |
| HG02122 | EAS | male |  | HG04186 | SAS | female |  | NA21101 | SAS | female |
| HG02127 | EAS | female |  | HG04188 | SAS | male |  | NA21102 | SAS | female |
| HG02128 | EAS | male |  | HG04189 | SAS | female |  | NA21103 | SAS | female |
| HG02130 | EAS | female |  | HG04194 | SAS | male |  | NA21104 | SAS | male |
| HG02131 | EAS | male |  | HG04195 | SAS | female |  | NA21105 | SAS | male |
| HG02133 | EAS | female |  | HG04198 | SAS | male |  | NA21106 | SAS | female |
| HG02134 | EAS | male |  | HG04200 | SAS | female |  | NA21107 | SAS | male |
| HG02136 | EAS | female |  | HG04202 | SAS | female |  | NA21108 | SAS | female |
| HG02137 | EAS | male |  | HG04206 | SAS | male |  | NA21109 | SAS | male |
| HG02138 | EAS | male |  | HG04209 | SAS | female |  | NA21110 | SAS | female |
| HG02139 | EAS | female |  | HG04210 | SAS | male |  | NA21111 | SAS | male |
| HG02140 | EAS | female |  | HG04211 | SAS | male |  | NA21112 | SAS | male |
| HG02141 | EAS | male |  | HG04212 | SAS | female |  | NA21113 | SAS | male |
| HG02142 | EAS | female |  | HG04214 | SAS | female |  | NA21114 | SAS | male |
| HG02143 | AFR | male |  | HG04216 | SAS | female |  | NA21115 | SAS | male |
| HG02144 | AFR | female |  | HG04219 | SAS | male |  | NA21116 | SAS | male |
| HG02146 | AMR | male |  | HG04222 | SAS | male |  | NA21117 | SAS | male |
| HG02147 | AMR | female |  | HG04225 | SAS | male |  | NA21118 | SAS | male |
| HG02150 | AMR | male |  | HG04227 | SAS | female |  | NA21119 | SAS | male |
| HG02151 | EAS | female |  | HG04229 | SAS | male |  | NA21120 | SAS | female |
| HG02152 | EAS | female |  | HG04235 | SAS | male |  | NA21122 | SAS | female |
| HG02153 | EAS | female |  | HG04238 | SAS | male |  | NA21123 | SAS | male |
| HG02154 | EAS | female |  | HG04239 | SAS | male |  | NA21124 | SAS | male |
| HG02155 | EAS | female |  | NA06984 | EUR | male |  | NA21125 | SAS | female |
| HG02156 | EAS | female |  | NA06985 | EUR | female |  | NA21126 | SAS | male |
| HG02164 | EAS | female |  | NA06986 | EUR | male |  | NA21127 | SAS | male |
| HG02165 | EAS | female |  | NA06989 | EUR | female |  | NA21128 | SAS | male |
| HG02166 | EAS | female |  | NA06994 | EUR | male |  | NA21129 | SAS | male |
| HG02178 | EAS | female |  | NA07000 | EUR | female |  | NA21130 | SAS | male |
| HG02179 | EAS | female |  | NA07037 | EUR | female |  | NA21133 | SAS | male |
| HG02180 | EAS | female |  | NA07048 | EUR | male |  | NA21135 | SAS | male |
| HG02181 | EAS | female |  | NA07051 | EUR | male |  | NA21137 | SAS | female |
| HG02182 | EAS | female |  | NA07056 | EUR | female |  | NA21141 | SAS | female |
| HG02184 | EAS | female |  | NA07347 | EUR | male |  | NA21142 | SAS | female |
| HG02185 | EAS | female |  | NA07357 | EUR | male |  | NA21143 | SAS | female |
| HG02186 | EAS | female |  | NA10847 | EUR | female |  | NA21144 | SAS | female |
| HG02187 | EAS | female |  | NA10851 | EUR | male |  |  |  |  |

**Table SIV. Antibodies used for Flow cytometry**

| **Antibody** | **Fluorochrome** | **Isotype and clone** | **Catalogue**  **number** | **Supplier** |
| --- | --- | --- | --- | --- |
| **CD56** | Horizon V450 | IgG1, B159 | 560360 | BD Biosciences |
| **CD3** | Horizon V500 | IgG1, SP34-2 | 560770 | BD Biosciences |
| **CD16** | FITC | IgG1, 3G8 | 555406 | BD Biosciences |
| **CD8** | PE-Cy7 | IgG1, RPA-T8 | 557746 | BD Biosciences |
| **NKp46** | APC | IgG1, 9E2/Nkp46 | 558051 | BD Biosciences |
| **CD69** | PE-Cy7 | IgG1, FN50 | 557745 | BD Biosciences |
| **NKG2D** | PE-Cy7 | IgG1, 1D11 | 562365 | BD Biosciences |
| **CD4** | Brillant Violet 570 | IgG1, RPA-T4 | 300533 | BioLegend |
| **KIR3DL1** | Alexa Fluor 700 | IgG1, DX9 | 312711 | BioLegend |
| **KIR2DL3** | APC | IgG2a, 180701 | FAB2014A | R&D |
| **KIR2DL4** | APC | IgG2a, 181703 | FAB2238A | R&D |
| **KIR2DS4** | PE | IgG2a, 179315 | FAB1847P | R&D |
| **KIR2DL1** | Alexa Fluor 700 | IgG1, 143211 | FAB1844N | R&D |
| **NKG2C** | PE | IgG1, 134591 | FAB138P | R&D |
| **NKG2C** | Alexa Fluor 488 | IgG1, 134591 | FAB138G | R&D |
| **NKG2C** | APC | IgG1, 134591 | FAB138A | R&D |
| **KIR2DL2/DL3** | PE | IgG2a, DX27 | 130-092-618 | Miltenyi |
| **KIR3DL1/DL2** | PE | IgG1, 5.133 | 130-095-205 | Miltenyi |
| **CD57** | PE-Cy5 | IgM, NK-1 | Ab25445 | Abcam |
| **KIR2DS2** | - | Polyclonal IgG | Ab128356 | Abcam |
| **KIR2DS2** | - | Monoclonal IgG | 1F12 | Gift Dr. Retière,France, |
| **F(ab’)2** | Qdot585 | IgG | Q-11411MP | Invitrogen |
